# Supplementary material for: Metallomics in deep time and the influence of ocean chemistry on the metabolic landscapes of Earth’s earliest ecosystems
Source: PubMed Central journal article supplement (PMC7080831; doi:10.1038/s41598-020-61774-w), 2020-03-18
Supplement: 41598_2020_61774_MOESM1_ESM.pdf [file 41598_2020_61774_MOESM1_ESM.pdf]

1 **Supplementary Material for: Metallomics in deep time and the influence of ocean**  
 2 **chemistry on the metabolic landscapes of Earth's earliest ecosystems**

3  
 4 Keyron Hickman-Lewis, Barbara Cavalazzi, Stéphanie Sorieul, Pascale Gautret, Frédéric Foucher,  
 5 Martin J. Whitehouse, Heejin Jeon, Thomas Georgelin, Charles S. Cockell, Frances Westall  
 6

7 <sup>1</sup>CNRS Centre de Biophysique Moléculaire, Rue Charles Sadron, 45071 Orléans, France

8 <sup>2</sup>Dipartimento di Scienze Biologiche, Geologiche e Ambientali (BiGeA), Università di  
 9 Bologna, Via Zamboni 67, I-40126, Bologna, Italy

10 <sup>3</sup>Department of Geology, University of Johannesburg, PO Box 524, Auckland Park 2006,  
 11 Johannesburg, South Africa

12 <sup>4</sup>University of Bordeaux, CNRS, IN2P3, CENBG, 19 Chemin du Solarium, 33175  
 13 Gradignan, France

14 <sup>5</sup>Université d'Orléans, ISTO, UMR 7327, 45071, Orléans, France; CNRS, ISTO, UMR 7327,  
 15 45071 Orléans, France; BRGM, ISTO, UMR 7327, BP 36009, 45060 Orléans, France

16 <sup>6</sup>NORDSIM, Department of Geosciences, Swedish Museum of Natural History,  
 17 Frescativägen 40, 114 18 Stockholm, Sweden.

18 <sup>7</sup>Sorbonne Universités, UPMC Paris 06, CNRS UMR 7197, Laboratoire de Réactivité de  
 19 Surface, 4 Place Jussieu, 75005 Paris, France

20 <sup>8</sup>UK Centre for Astrobiology, School of Physics and Astronomy, University of Edinburgh,  
 21 James Clerk Maxwell Building, Edinburgh, EH9 3JZ, United Kingdom  
 22

23 Correspondence: keyron.hickman-lewis@cnrs-orleans.fr  
 24

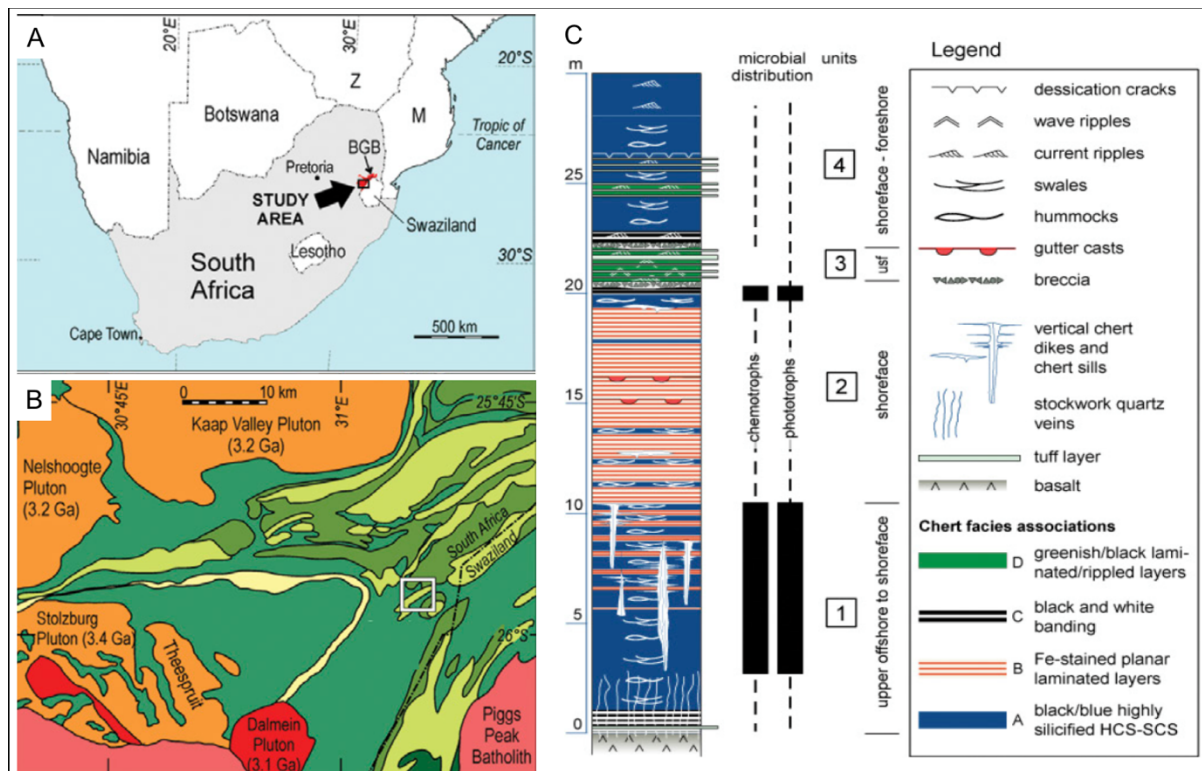

25  
 26  
 27 **Figure S1.** Location, geological setting and stratigraphy of the Josefsdal Chert (equivalent to  
 28 K3c; Lowe and Byerly, 1999). **A)** Location of the Barberton greenstone belt within South  
 29 Africa and Swaziland. **B)** Location of the study area (white box) within the Barberton

30 greenstone belt, close to Msauli and the border with eSwatini. C) Stratigraphic column of the  
31 Josefsdal Chert; the studied samples come from Facies C, hydrothermally influenced banded  
32 black and white cherts from units 3 and 4. Adapted from Westall et al. (2015).

33  
34  
35  
36

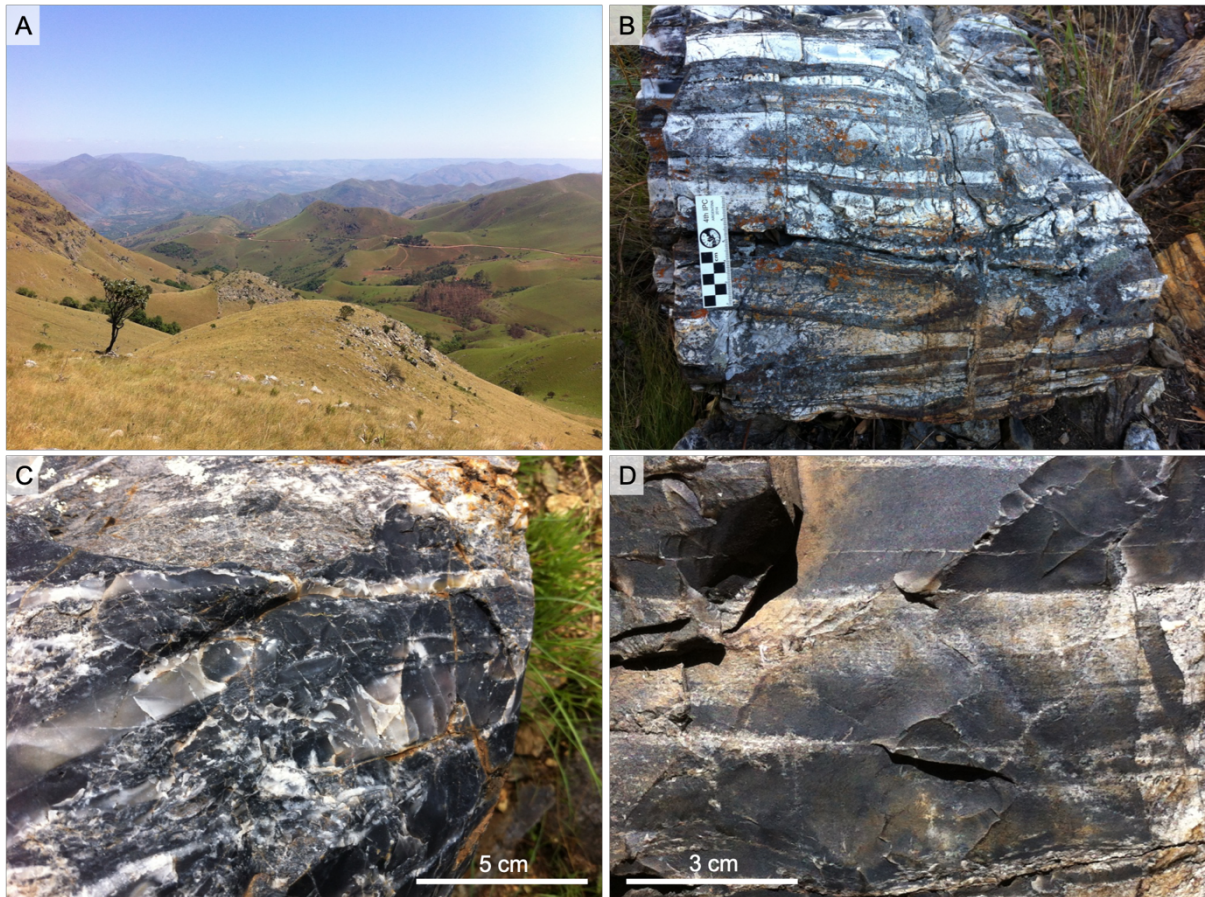

37  
38

39 **Fig. S2.** Selected field photographs from the studied outcrops. A) Field photograph of the  
40 studied Josefsdal Chert outcrops near Msauli. B) Black and white banded chert representative  
41 of, e.g., samples 12SA09 and 12SA16 (sample 12SA09 shown). Squares on scale bar = 1cm.  
42 C-D) Massive black chert with faint laminations characterised by clotted textures in thin  
43 section, showing collection localities of samples 99SA07 (C) and 14SA01 (D). Note the spatial  
44 delimitation of carbon-rich regions and white silica-rich regions corresponding to elevated  
45 silica input. Detailed information regarding these outcrops and the other lithologies of the  
46 Josefsdal Chert can be found in Westall et al. (2015).

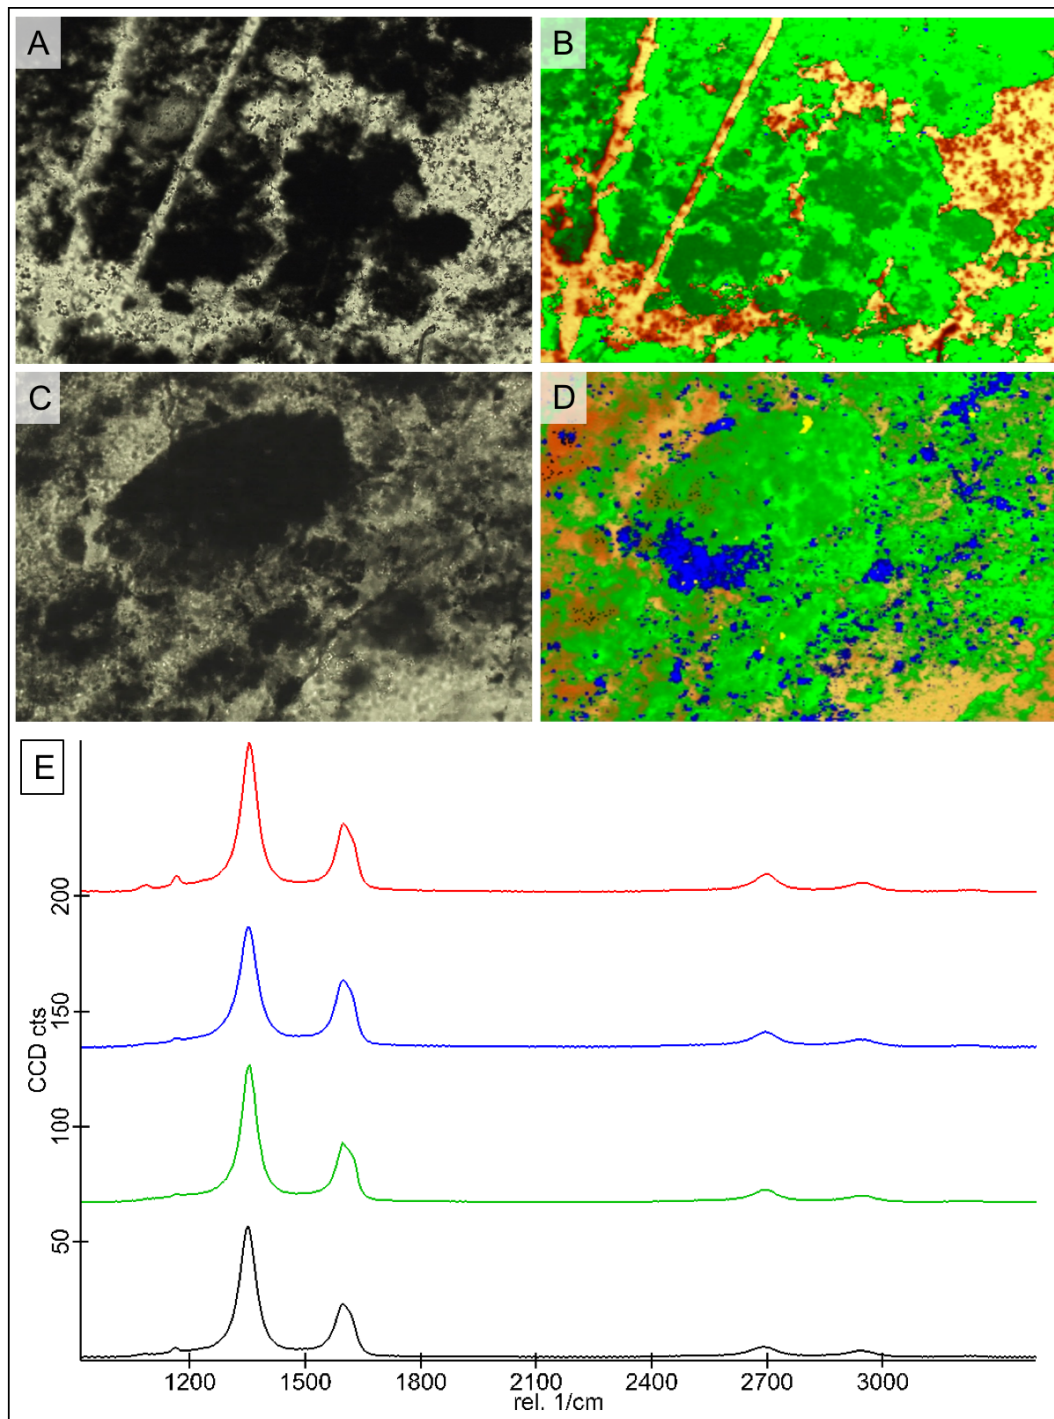

47  
 48  
 49  
 50  
 51  
 52  
 53  
 54  
 55

**Figure S3.** Optical microscopy and Raman spectroscopy mapping for regions of interest. **A-**  
**B)** Irregular clotted carbonaceous chert. **C-D)** Volcanic particle coated in carbonaceous  
 material in a volcanoclastic sediment. Green = carbon; yellow-orange = silica and blue =  
 anatase. **E)** Averaged Raman spectra of carbonaceous matter within the structures of interest  
 for four samples (99SA07, 12SA09, 12SA16 and 14SA01).

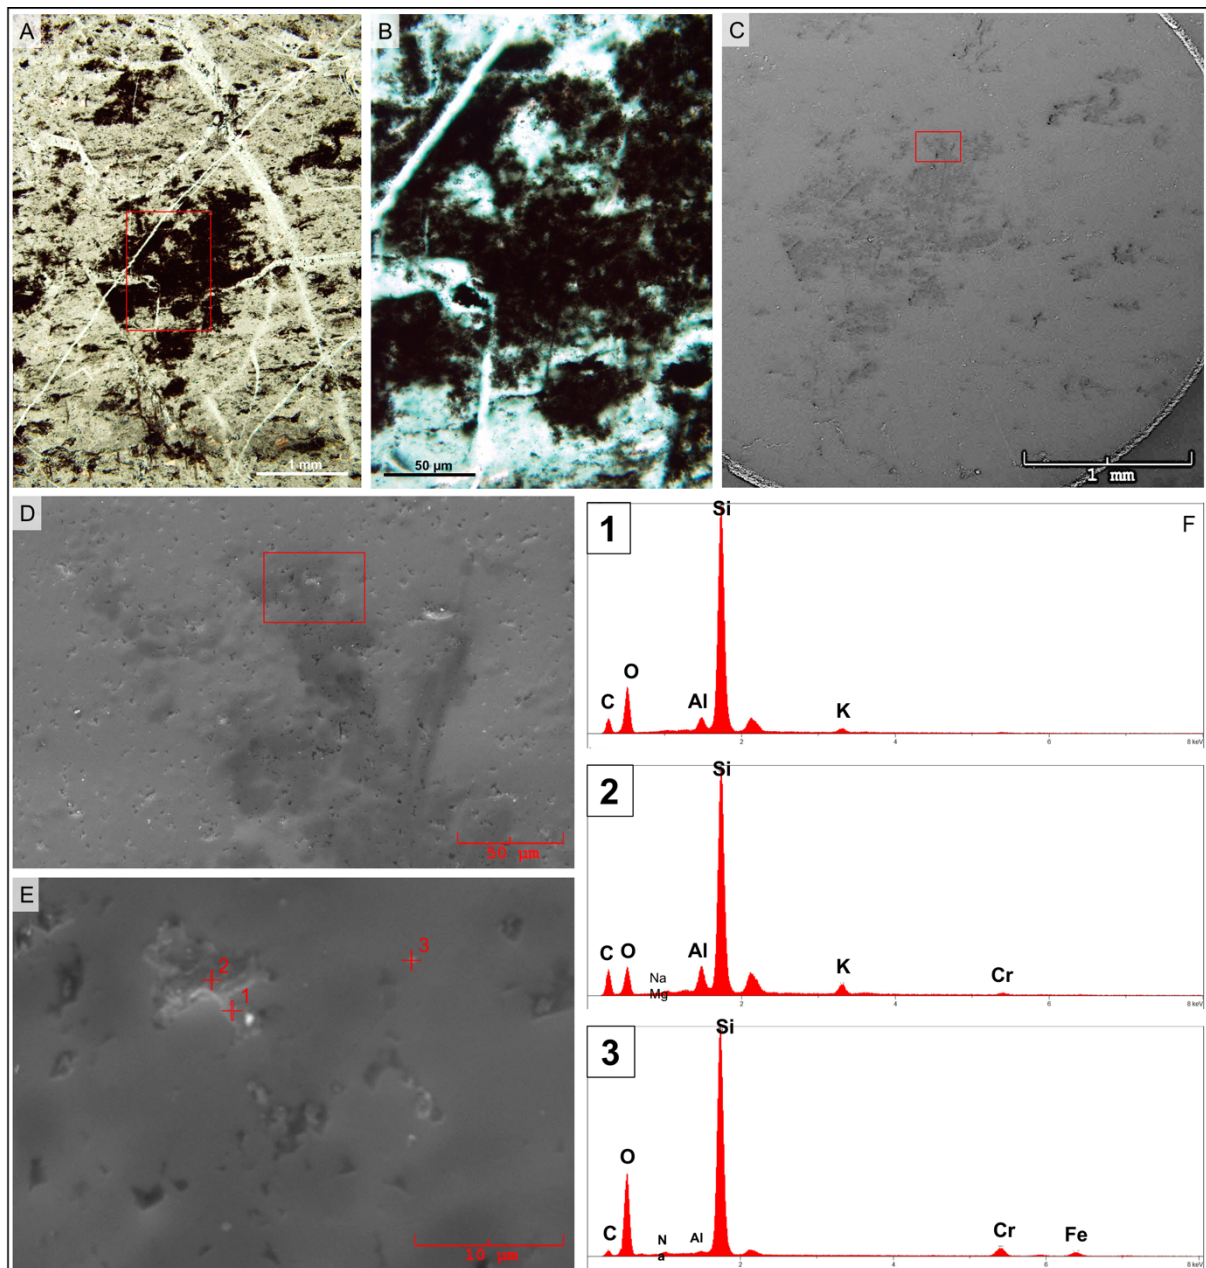

56  
57

58 **Figure S4.** SEM-EDS of irregular clots in clotted carbonaceous chert (sample 99SA07, region  
59 1). **A)** Transmitted light photomicrograph of irregular clot in thin section; boxed area detailed  
60 in **B).** **B)** Detail of irregular clot. **C)** Electron image of the same clot; red box indicates region  
61 of **D).** Carbonaceous matter is dark grey, silica is light grey. **D)** Electron image of limb of clot;  
62 red box indicates region of **E).** **E)** Regions of EDS point analyses (numbered crosses). **F)** EDS  
63 point analyses on Au-coated sample accounting for point enrichments in Al, Na, Mg, K, Cr  
64 and Fe. Spectra 1 and 2 are aluminous phyllosilicates, whereas spectrum 3 is likely a sub-  
65 micron chromite spinel.

66

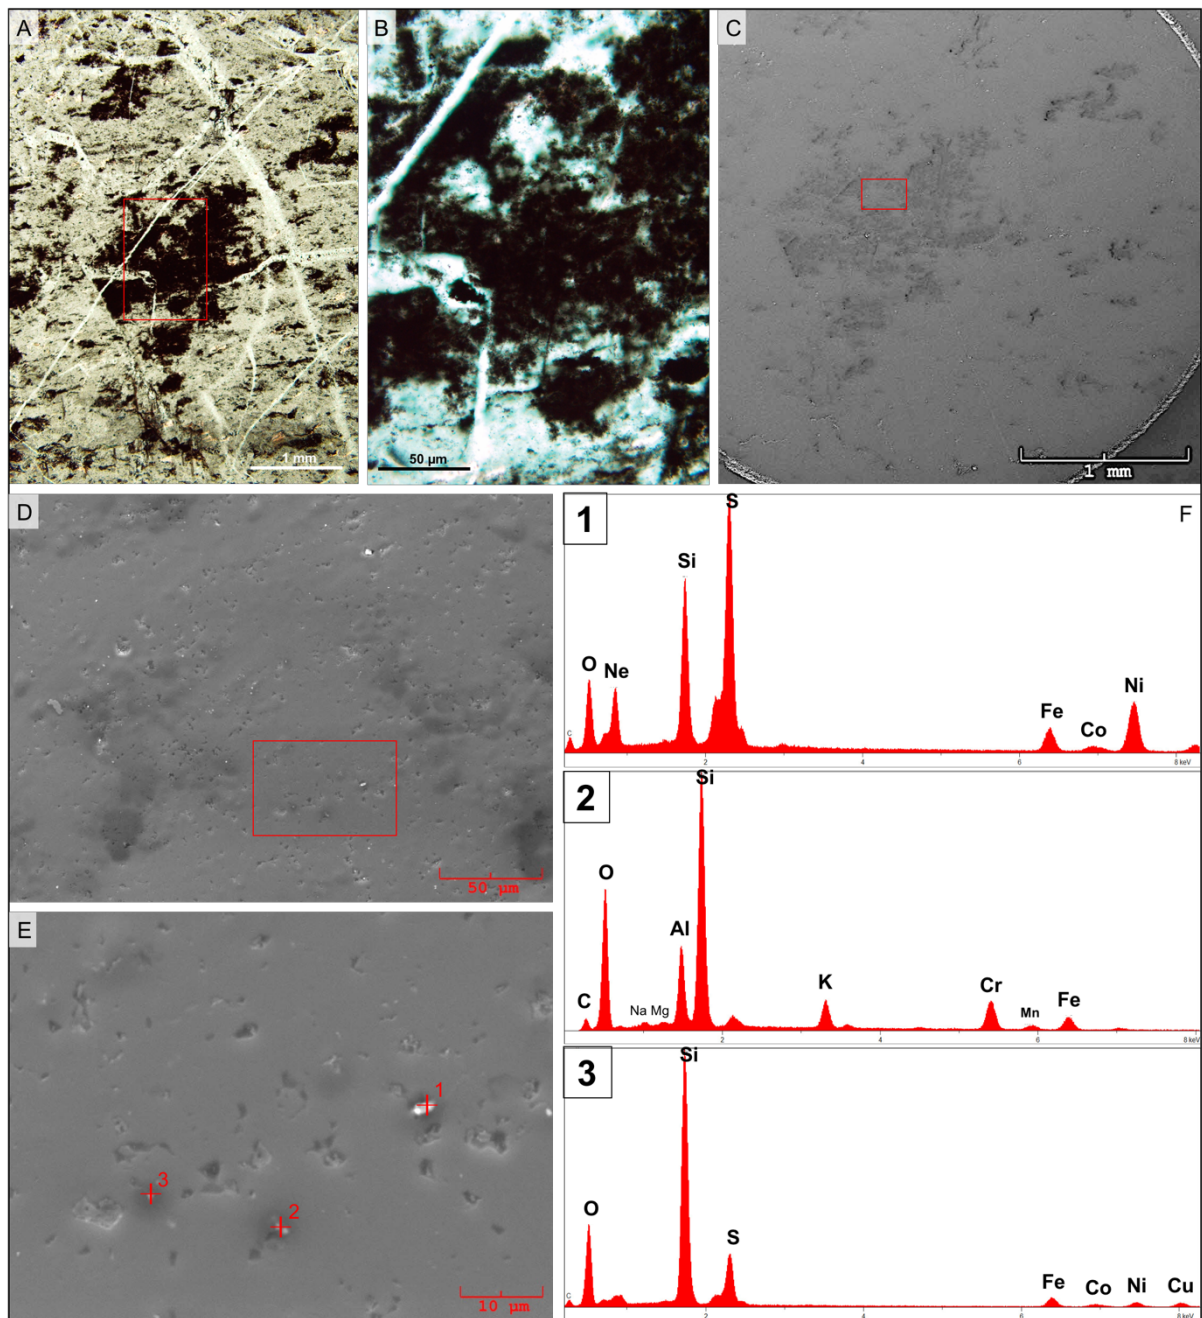

67

68

69 **Figure S5.** SEM-EDS of irregular clots in clotted carbonaceous chert (sample 99SA07, region  
 70 2). **A)** Transmitted light photomicrograph of irregular clot in thin section; boxed area detailed  
 71 in **B.** **B)** Detail of irregular clot. **C)** Electron image of the clot in **A;** red box indicates region of  
 72 **D.** Carbonaceous matter is dark grey, silica is light grey. **D)** Electron image of interior of clot;  
 73 red box indicates region of **E.** **E)** Regions of EDS point analyses. **F)** EDS point analyses on  
 74 Au-coated sample accounting for point enrichments in Al, Na, Mg, S, K, Cr, Mn, Co, Fe and  
 75 Ni. Spectra 1 and 3 are Fe-Ni sulphides (pyrite-pentlandite), whereas spectrum 2 is an  
 76 aluminous phyllosilicate.

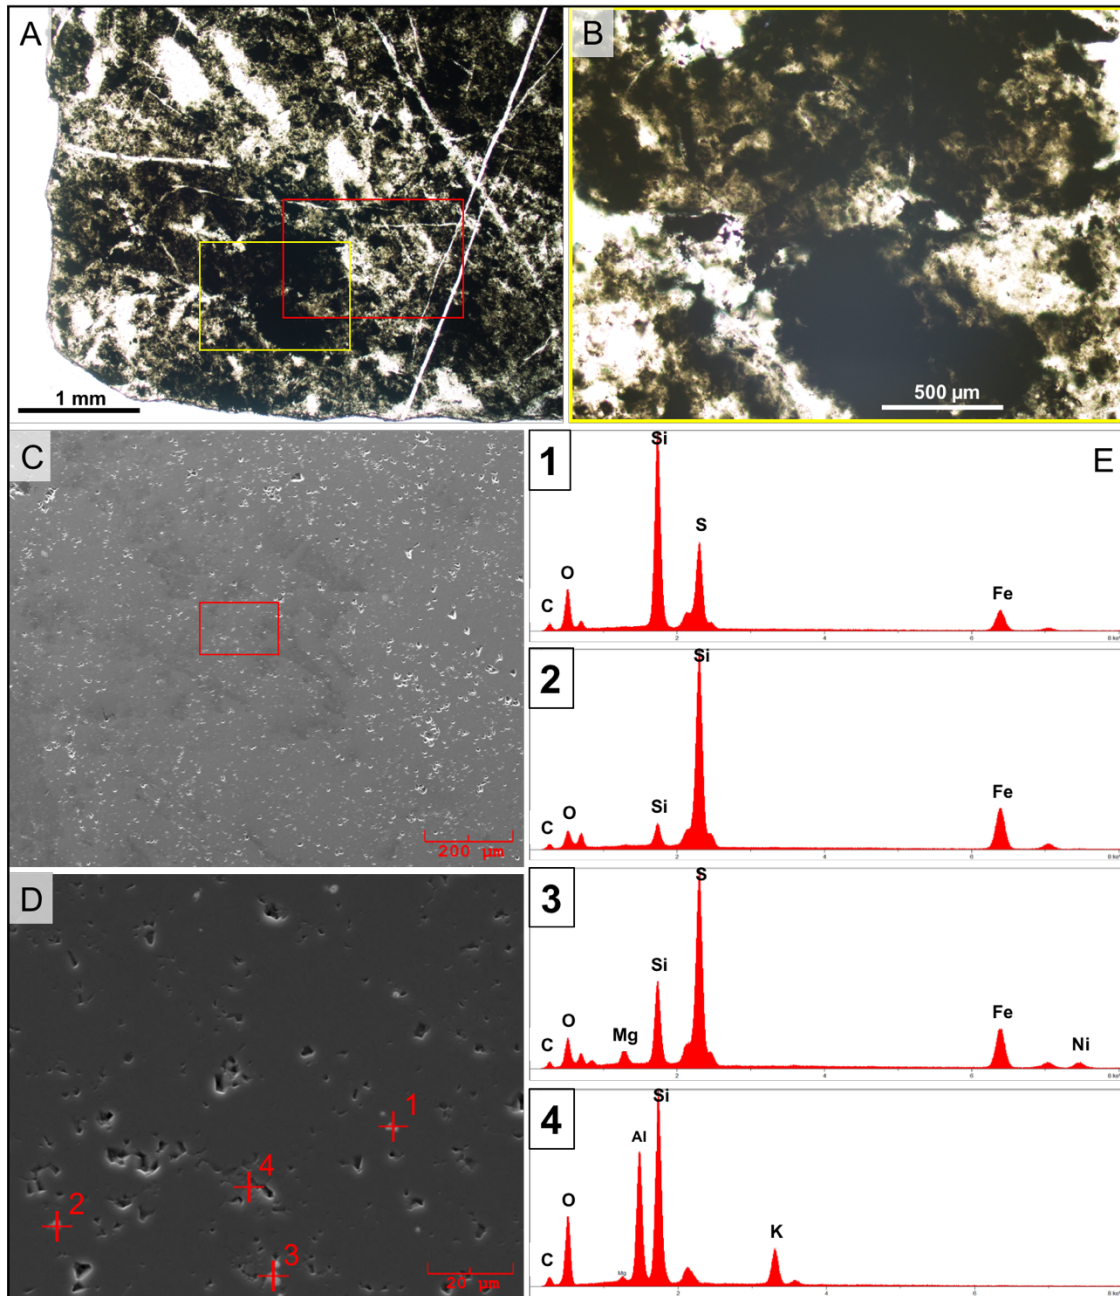

77

78

79 **Figure S6.** SEM-EDS of irregular clots in clotted carbonaceous chert (sample 12SA09). **A)**

80 Transmitted light photomicrograph of irregular clot in volcanogenic groundmass in thin

81 section. Yellow box indicates region of B; red box indicates region of C. **B)** Detail of irregular

82 clot. **C)** Electron image of the clot in A; red box indicates region of D. Carbonaceous matter is

83 dark grey, silica is light grey. **D)** Region of EDS point analyses. **E)** EDS point analyses on Au-

84 coated sample accounting for point enrichments in Al, Na, Mg, S, K, Cr, Mn, Co, Fe and Ni.

85 Spectra 1 and 3 are Fe-Ni sulphides (pyrite-pentlandite), whereas spectrum 2 is an aluminous

86 phyllosilicate.

87

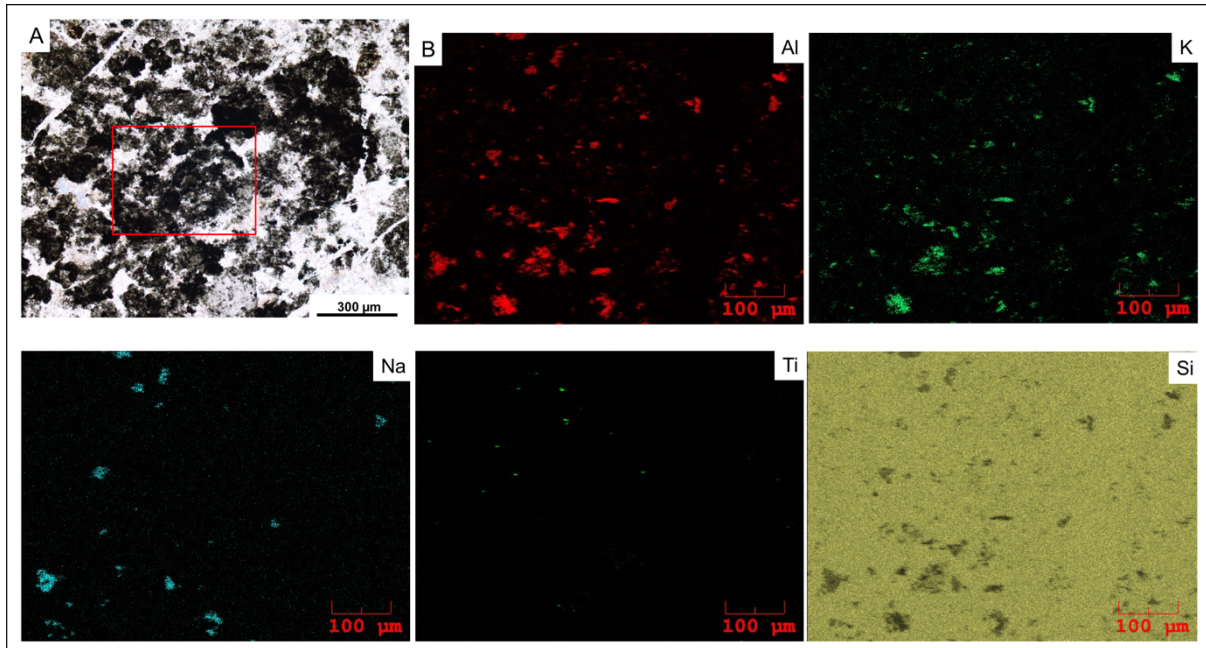

88  
 89  
 90  
 91  
 92  
 93  
 94  
 95  
 96  
 97  
 98  
 99  
 100  
 101  
 102  
 103  
 104  
 105  
 106  
 107  
 108  
 109  
 110

**Figure S7.** SEM-EDX mapping of carbon-coated volcanic grains (sample 14SA01). **A)** Transmitted light photomicrograph of carbon-coated volcanogenic grains. Red box indicates the region of the EDX maps. **B)** EDX maps of Al, K, Na, Ti and Si. Correlated Al-K-Na-(Mg)-(Fe) indicates particles of mafic and felsic genesis, likely feldspars, pyroxenes and minor olivine, the latter represented by slight enrichments in Mg. Na-Al-K enrichments in tabular particles are probably relict feldspars. Ti is enriched in ilmenite and rutile. Ti corresponds to rutile crystals. SiO<sub>2</sub> is overwhelmingly the major constituent of the rock.

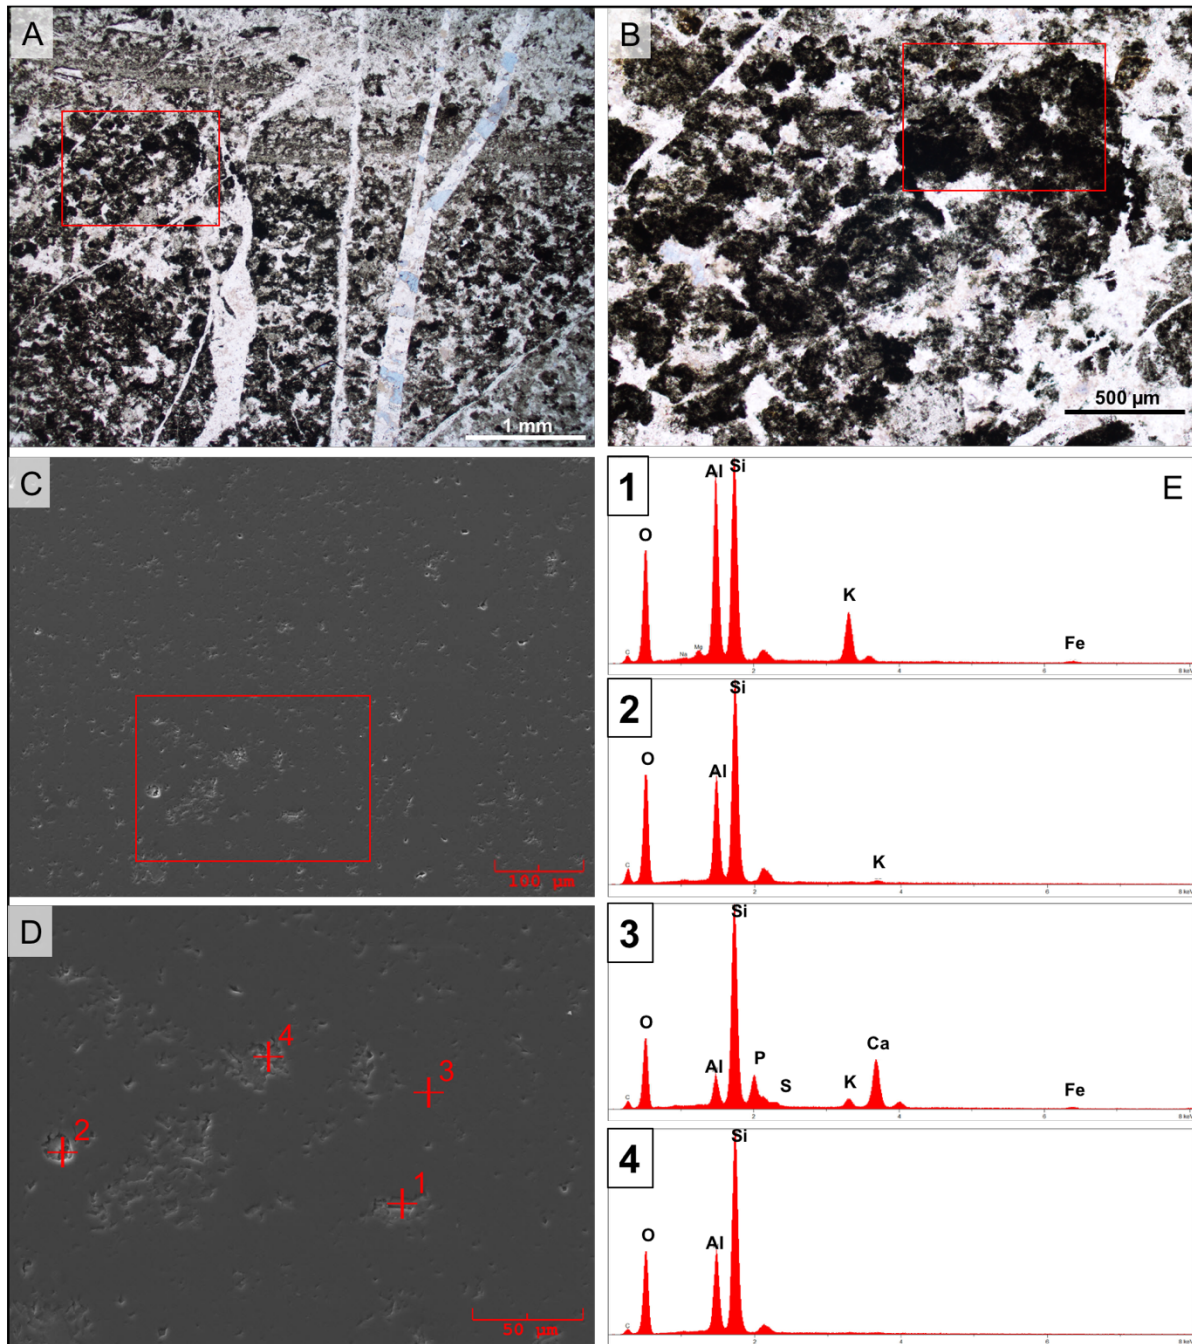

111  
 112  
 113  
 114  
 115  
 116  
 117  
 118  
 119  
 120  
 121

**Figure S8.** SEM-EDS of carbon-coated volcanic particles (sample 14SA01). **A)** Petrographic image of carbon-coated volcanogenic particles. Red box indicates region of **B**. **B)** Detail of carbon-coated volcanic particles. Red box indicates region of **C**. **C)** Electron image of the particle in **B**; red box indicates region of **D**. **D)** Region of EDS point analyses. **E)** EDS point analyses accounting for point enrichments in Al, Na, Mg, P, K, Ca and Fe. 1 is an altered alkali feldspar, 2 and 4 are aluminous phyllosilicates, 3 is apatite with pyrite and K-feldspar (both unseen) seemingly within the region of analysis.



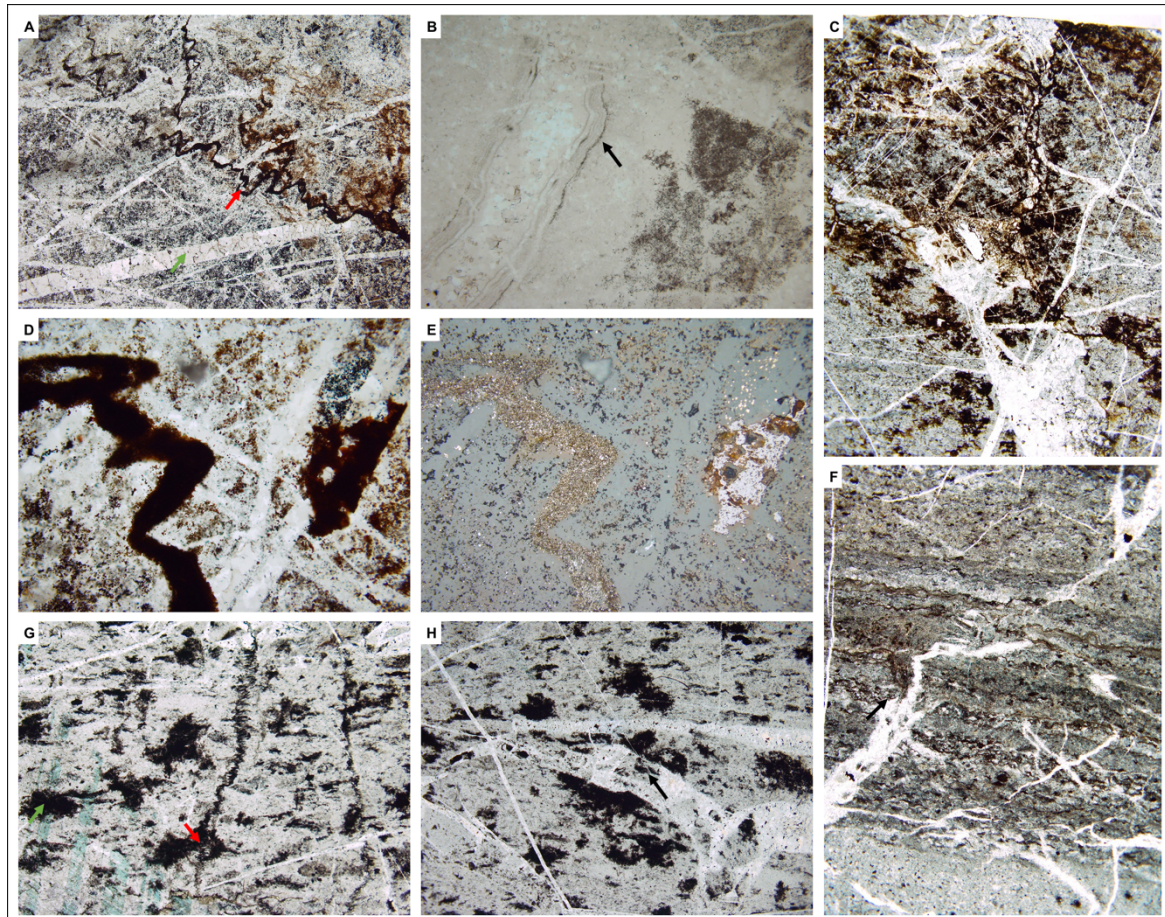

122  
123

124 **Figure S9.** Optical petrographic images indicating features or fabrics of demonstrably  
 125 secondary origin, and which were avoided in the selection of regions of analysis in order to  
 126 assure that the recorded geochemical signature is primary. A) Stylolite (red arrow) resulting  
 127 from pressure solution fronts, and large secondary megaquartz vein (green arrow). B)  
 128 Botryoidal chert fabrics developing within penecontemporaneous veins and leading to the  
 129 secondary displacement of carbonaceous material (arrowed). C) Metal-bearing fluid alteration  
 130 textures and chaotic secondary vein fabrics which may leach elements into their immediate  
 131 vicinity. (dark and stained regions). D-E) Stylolites rich in metal oxides of probable syn- or  
 132 post-diagenetic origin and large secondary oxide particle of no relevance to the primary  
 133 sedimentary fabric. F) Primary laminated chert altered and distended by secondary quartz veins.  
 134 Note the disruption of primary carbonaceous laminations (arrowed). G) Irregular clots in direct  
 135 contact with stylolites (cut across), considered unreliable for analysis (red arrow). Clots further  
 136 from the stylolite are considered fit for analysis (green arrow). H) Carbonaceous material  
 137 entrained within post-depositional megaquartz vein (arrowed), the primary character of which  
 138 cannot be assured; therefore, these are considered unsuitable for analysis.

139  
140

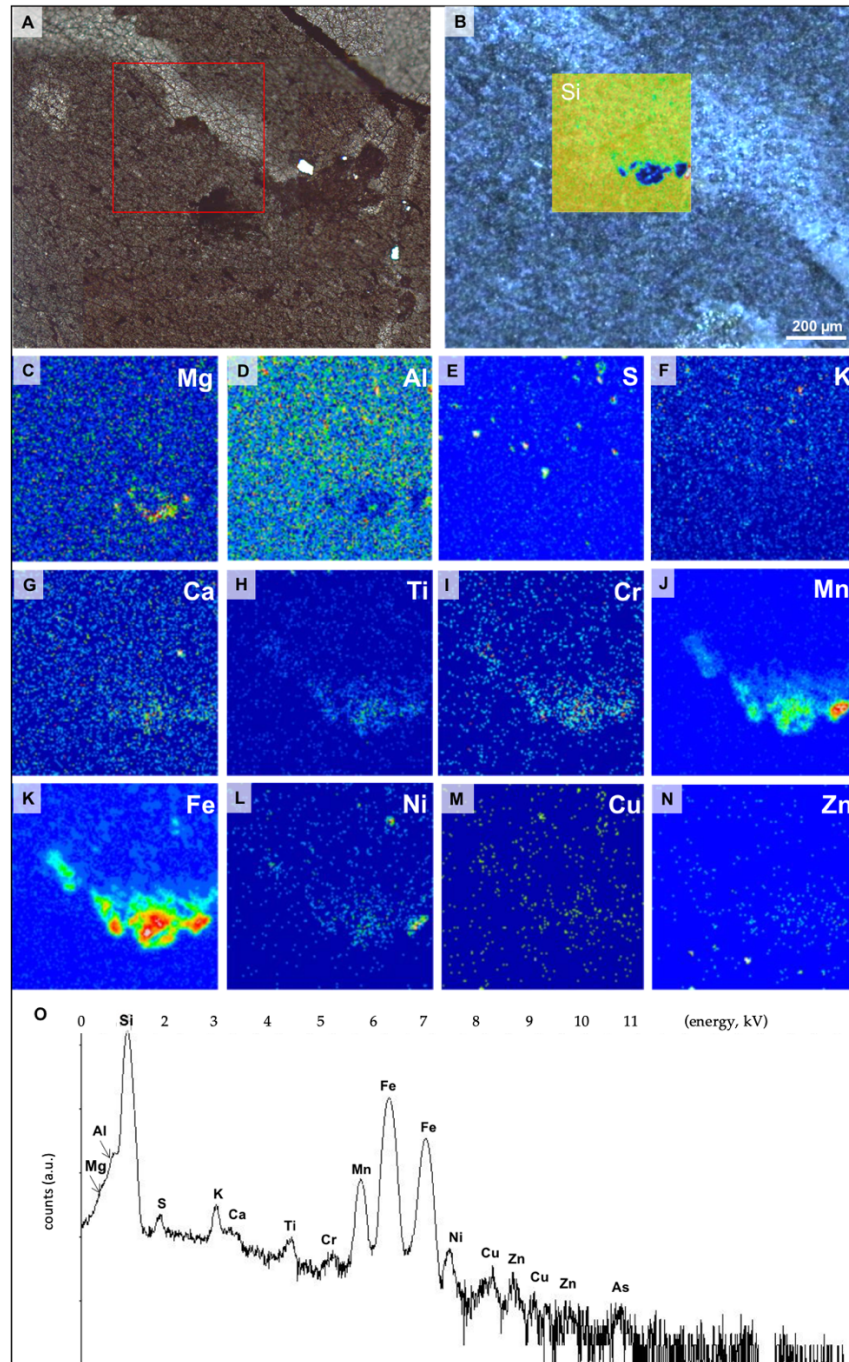

142

143

144 **Figure S10.** PIXE analysis of one matrix zone (sample 12SA34). **A)** Transmitted light  
 145 photomicrograph mosaic of the matrix. Red box indicates the region of **B).** Optical image of the  
 146 matrix, superimposed with silica map, demonstrating the anti-correlation with the siderite-  
 147 rhodochrosite crystals. **C)** Elemental maps of major and trace elements within the matrix: Mg,  
 148 Ca, Ti, Cr, Mn, Fe, Ni, Cu and Zn are concentrated within the siderite-rhodochrosite crystal  
 149 aggregate, Al is anti-correlated with the crystals. Fe, Ni, Cu and Zn are further concentrated in  
 150 micron-scale particles elsewhere in the matrix. **D)** Corresponding PIXE spectrum.

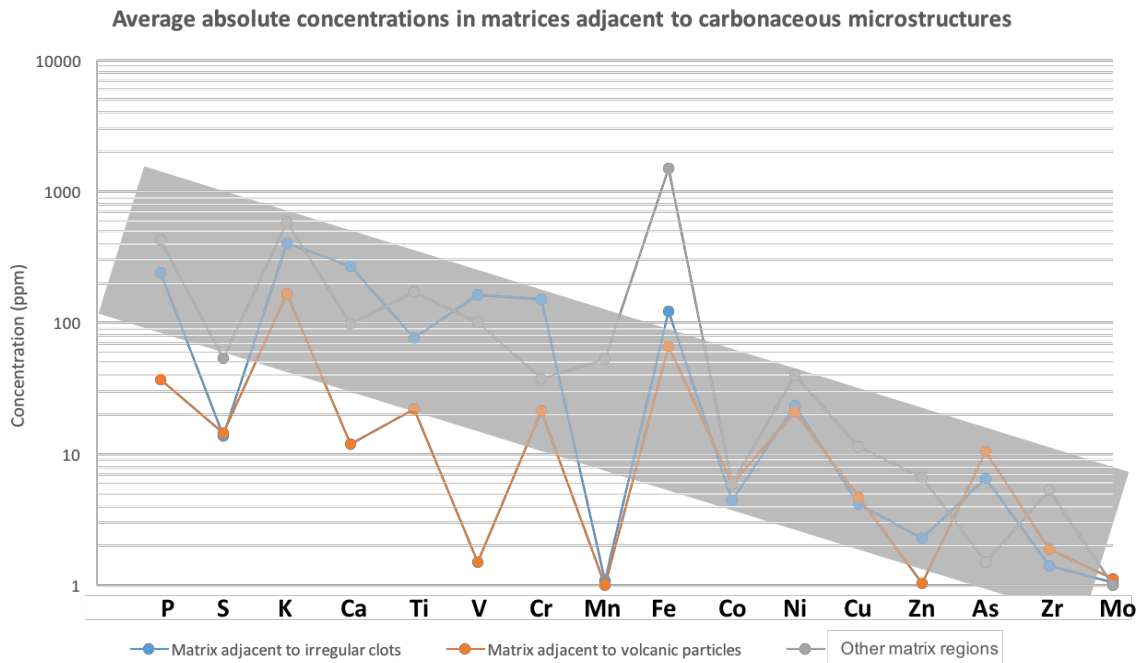

152

153

154 **Figure S11.** Average concentrations of the sixteen studied elements within the matrices  
 155 adjacent to the carbonaceous microstructures of interest. Concentrations are broadly  
 156 equivalent, with the exception of greatly enriched Fe in sample 12SA34 (matrix adjacent to  
 157 flakes), which can be accounted for by the presence of randomly distributed siderite. The grey  
 158 trend-line is comparable to that of the ICP-MS data (Fig. 3A) and all trends bear similarity to  
 159 the flakes trend-line (Fig. 3D), indicating no directional concentration by the flakes.

160

161

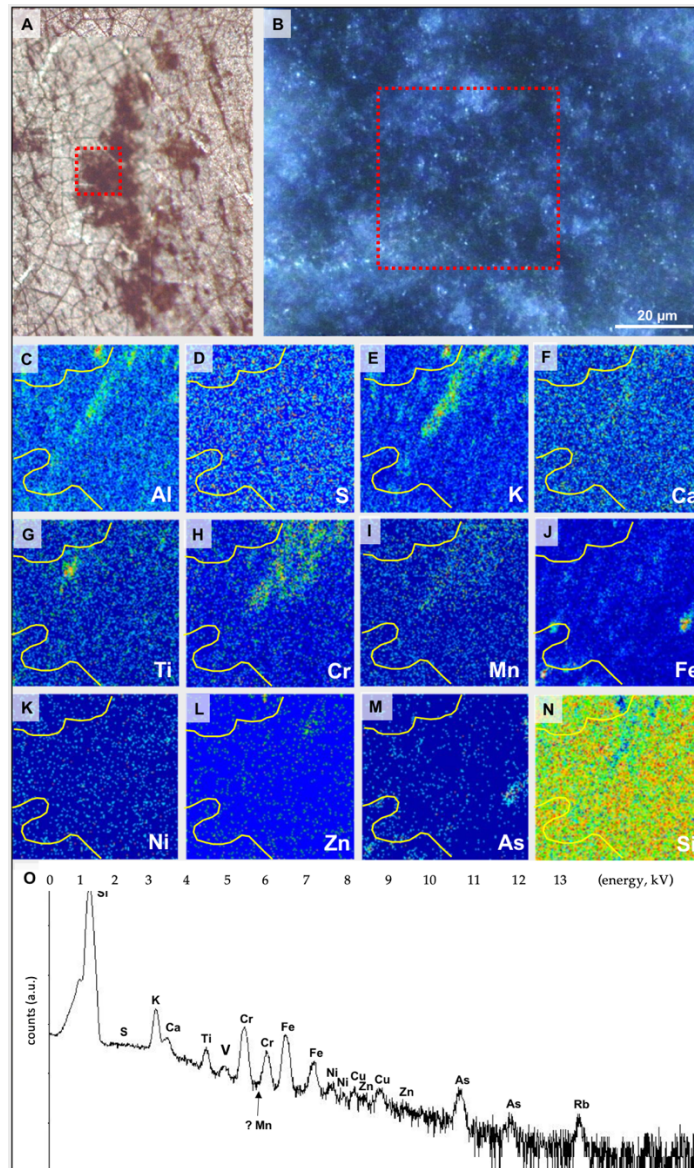

162  
163

164 **Figure S12.** PIXE analysis of irregular clot (sample 99SA07). **A)** Transmission light  
165 photomicrograph mosaic of the studied clot. Red box indicates the region of **B).** Optical  
166 image of the clot. Red box indicates the region mapped. **C)** Elemental maps of major and trace  
167 elements within the clotted material and adjacent matrix (yellow lines denote the edge of the  
168 carbon). Note that, aside from enrichment in the linear crystal mass at the upper centre of the  
169 image (and other minor minerals), Al, S, K, Cr, Mn, Fe, Ni, Zn and As are broadly enriched  
170 within the carbonaceous matter relative to the matrix (compare matrix zone at upper left). Ca  
171 and Ti are uniformly enriched throughout both clot and matrix. Si is depleted within the clotted  
172 carbon. **D)** Spectrum from the zone of carbonaceous material. Although Mn is mapped, its  
173 presence is difficult to determine, since it occurs on the shoulder of the Cr  $K_{\text{beta}}$  peak. X and Y  
174 axes are energy channel (instrumental) and counts per channel, respectively.

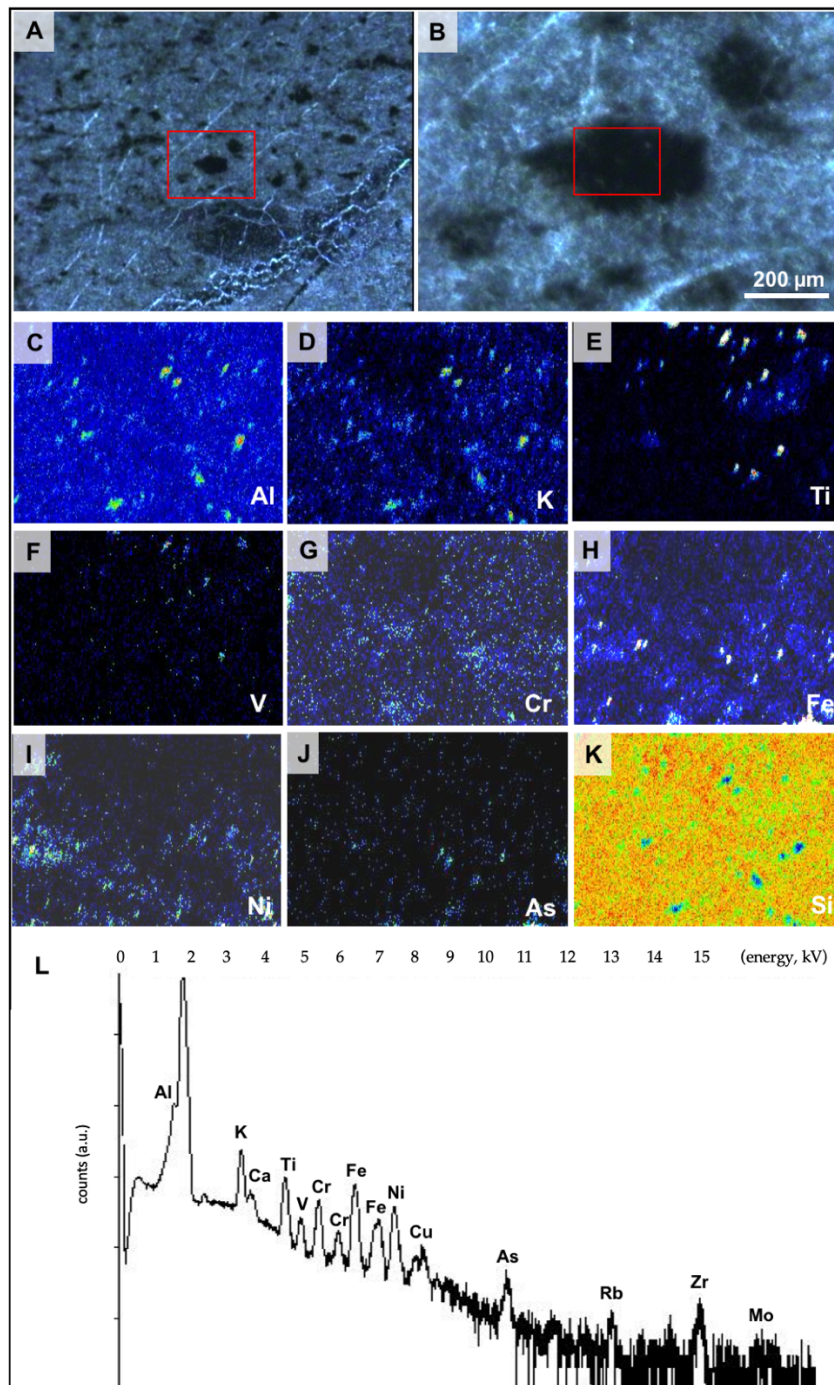

175  
 176  
 177  
 178  
 179  
 180  
 181  
 182  
 183  
 184

**Figure S13.** PIXE analysis of carbon-coated volcanic particle (sample 14SA01). **A)** Optical image of the sample. Red box indicates the region of **B).** **B)** Optical image of the particle. Red box indicates the region mapped. **C)** Elemental maps of major and trace elements within the carbonaceous material. **D)** Spectrum from the zone of carbonaceous material. X and Y axes are energy channel (instrumental) and counts per channel, respectively.

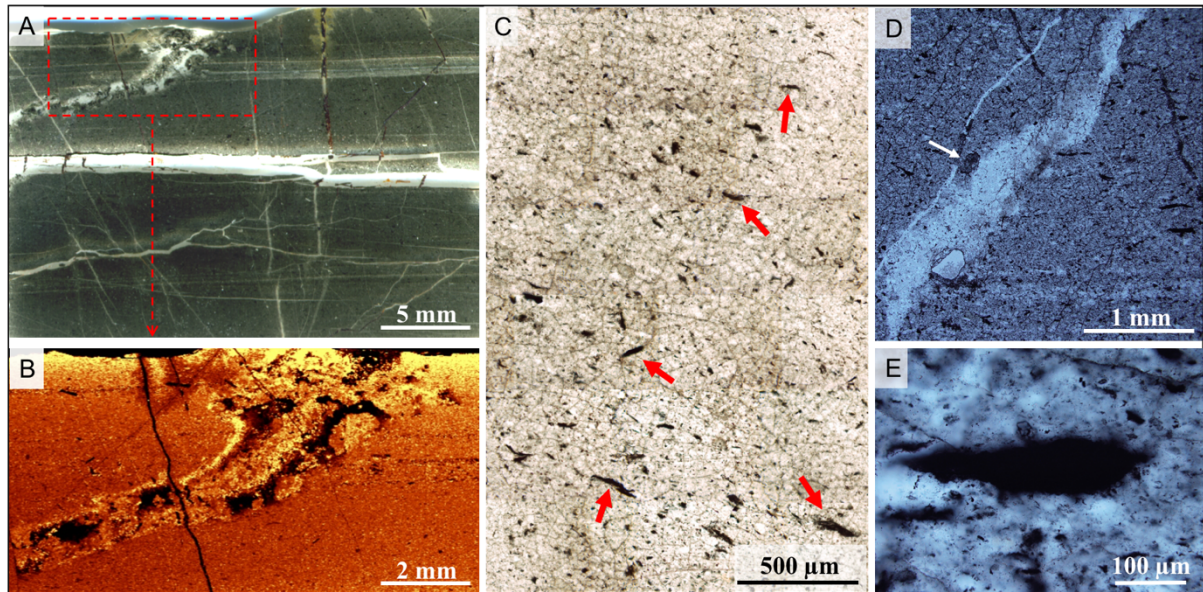

185

186

187 **Figure S14.** Geological setting of carbonaceous flakes in hydrothermally permeated sediment.

188 **A)** Thin section scan of sample 12SA34, through which pass vertical and stratiform veins of

189 hydrothermal origin. The red box denotes a miniature vent mapped by Raman spectroscopy in

190 **B. B)** Raman map of carbon, wherein brightness corresponds to occurrence of carbonaceous

191 material. Note therefore that carbon is greatly enriched within the fluids in the vent relative to

192 the surrounding sediment. **C)** Carbonaceous flakes (arrowed) and disaggregated carbonaceous

193 material distributed throughout the matrix. **D)** PIXE instrument's optical image of the matrix,

194 which includes frequent siderite particles (arrowed). **E)** PIXE instrument's optical image of a

195 carbonaceous flake with tapered margins.

196

197

198

199

200

201

202

203

204

205

206

207

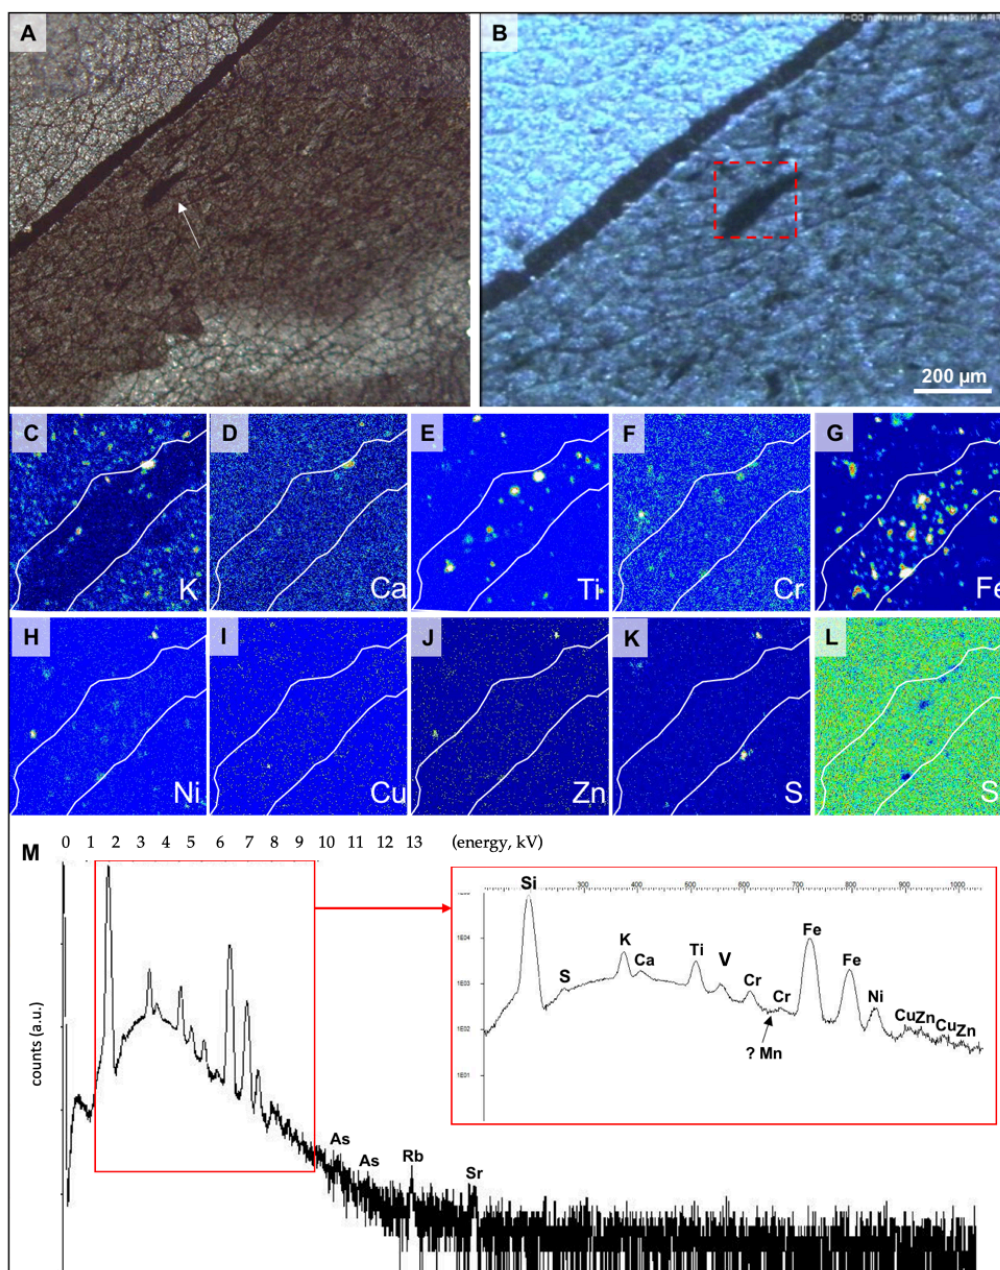

208

209

210 **Figure S15.** PIXE elemental mapping of flake (sample 12SA34). **A)** Petrographic image  
 211 mosaic of the studied flake. **B)** PIXE instrument's optical image of the clot. Red box indicates  
 212 the region mapped. **C)** PIXE spectroscopy mapping of major and trace elements within the  
 213 flake and adjacent matrix (yellow lines denote the edge of the carbon). K, Ti, Cr, Fe, Ni and  
 214 Cu are enriched specifically in micron-scale mineral particles within the flake and matrix. Zn  
 215 and S are enriched specifically in particles dispersed throughout the matrix. Ca is uniformly  
 216 enriched throughout both flake and matrix. **D)** PIXE spectra from the zone of carbonaceous  
 217 material. The presence of Mn in the spectra is difficult to determine, since it occurs on the  
 218 shoulder of the minor Cr  $K_{\beta}$  peak.

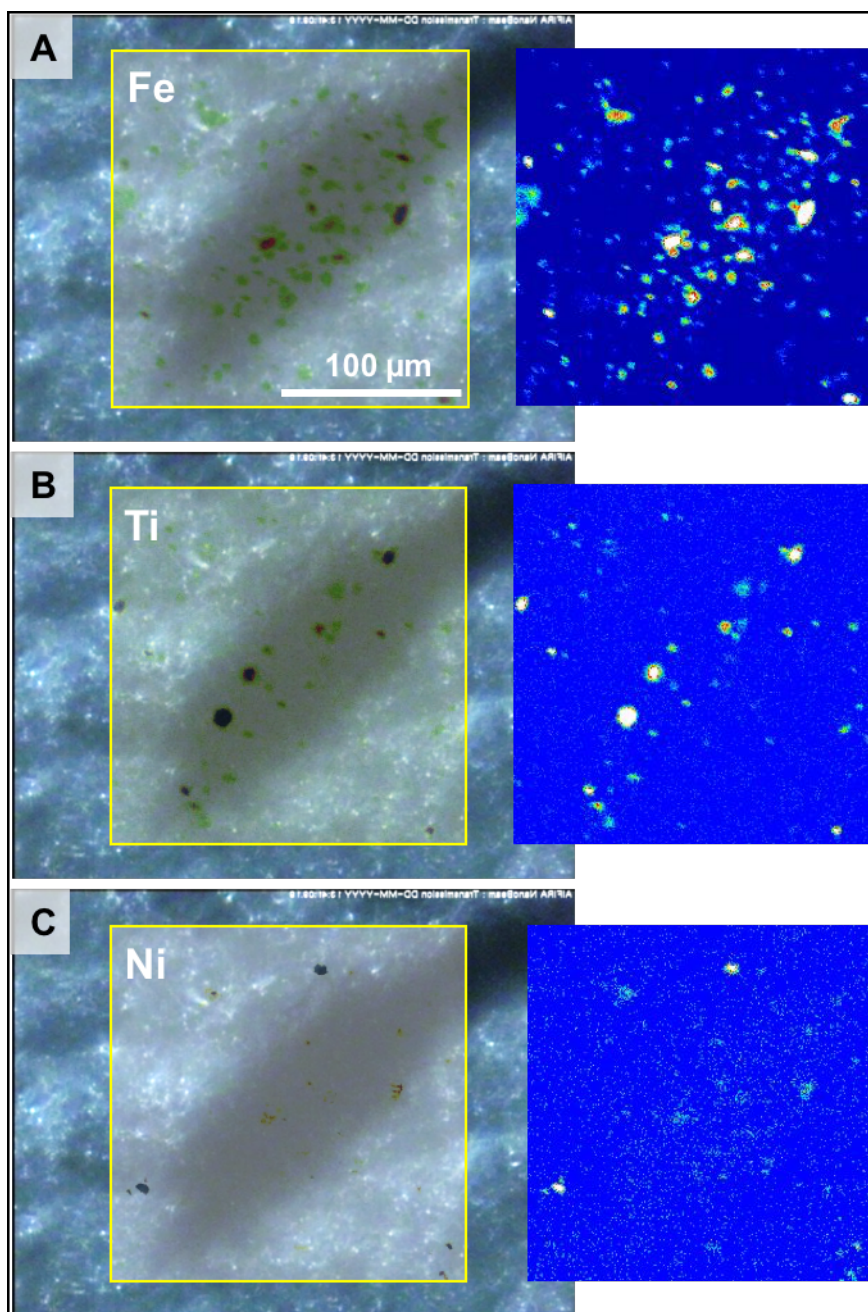

219

220

221 **Figure S16.** PIXE elemental mapping of **A) Fe**, **B) Ti** and **C) Ni** within carbonaceous flake  
 222 (sample 12SA34). These maps (comparable in the case of each flake studies) demonstrate  
 223 beyond doubt that the enrichment within this morphology of carbonaceous material is not due  
 224 to trace metals being distributed throughout the carbon, but rather localised within equant  
 225 microcrystals.



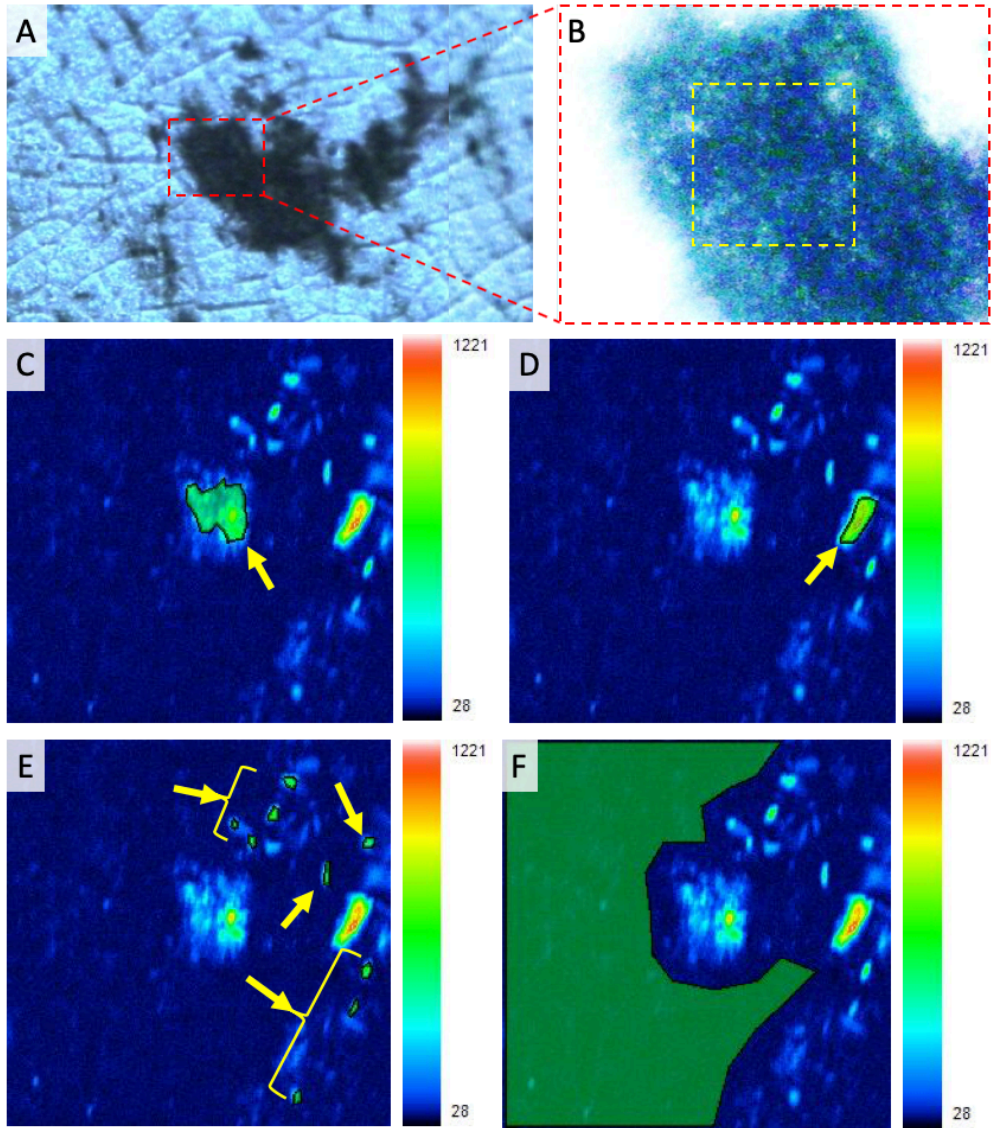

226  
227

228 **Figure S17.** Application of the ‘mineral effect’, identification of micron-scale mineral phases  
 229 and analysis of the selected area from which the elemental complement of carbonaceous  
 230 material was calculated using PIXE software. **A-B)** μPIXE instrument optical views of a  
 231 section of the studied clot. Region of analysis shown by yellow box = 200 μm square). **C-E)**  
 232 Yellow arrows indicating the presence of mineral particles that were eliminated from analysis  
 233 of carbonaceous material, since they may skew the results of metal enrichment to higher values.  
 234 **F)** Example area of carbonaceous material characterised by μPIXE, which is demonstrably free  
 235 of mineral particles. Consequently, all metal enrichment reported in this region will be  
 236 indigenous to carbonaceous material. The reported results show only the analyses from  
 237 carefully selected and strictly characterised areas such as these.

238

239

240

241

242

243

**Table S1. Results ( $\delta^{13}\text{C}$ ) of SIMS carbon isotope analyses.**

| Analysis ID    | Ratio Average | SE%  | $\delta^{13}\text{C}$ (PDB) ‰ | $\delta^{13}\text{C} \pm \%$ |
|----------------|---------------|------|-------------------------------|------------------------------|
| Sample 99SA07  |               |      |                               |                              |
| Irreg. Clot 1  | 0.01067       | 0.11 | -12.65                        | 2.04                         |
| Irreg. Clot 2  | 0.01064       | 0.24 | -15.86                        | 2.95                         |
| Irreg. Clot 3  | 0.01065       | 0.11 | -15.15                        | 2.04                         |
| Irreg. Clot 4  | 0.01077       | 0.09 | -3.49                         | 1.94                         |
| Irreg. Clot 5  | 0.01071       | 0.11 | -9.21                         | 2.04                         |
| Irreg. Clot 6  | 0.01066       | 0.15 | -14.33                        | 2.28                         |
| Irreg. Clot 7  | 0.01075       | 0.17 | -5.27                         | 2.42                         |
| Irreg. Clot 8  | 0.01079       | 0.15 | -1.47                         | 2.28                         |
| Sample 12SA16  |               |      |                               |                              |
| Irreg. Clot 9  | 0.01066       | 0.17 | -13.44                        | 2.42                         |
| Irreg. Clot 10 | 0.01060       | 0.29 | -19.54                        | 3.37                         |
| Irreg. Clot 11 | 0.01079       | 0.10 | -1.89                         | 1.99                         |
| Irreg. Clot 12 | 0.01070       | 0.15 | -10.54                        | 2.28                         |
| Irreg. Clot 13 | 0.01067       | 0.07 | -13.42                        | 1.85                         |
| Sample 12SA09  |               |      |                               |                              |
| Irreg. Clot 14 | 0.01073       | 0.15 | -6.90                         | 2.28                         |
| Irreg. Clot 15 | 0.01071       | 0.09 | -8.83                         | 1.94                         |
| Irreg. Clot 16 | 0.01066       | 0.17 | -14.25                        | 2.42                         |
| Irreg. Clot 17 | 0.01077       | 0.14 | -3.67                         | 2.21                         |
| Irreg. Clot 18 | 0.01081       | 0.09 | 0.03                          | 1.94                         |
| Sample 12SA09  |               |      |                               |                              |
| Coating 1      | 0.01037       | 0.91 | -41.30                        | 9.26                         |
| Coating 2      | 0.01070       | 0.17 | -10.14                        | 2.42                         |
| Coating 3      | 0.01071       | 0.24 | -9.19                         | 2.95                         |
| Coating 4      | 0.01062       | 0.27 | -17.51                        | 3.20                         |
| Coating 5      | 0.01070       | 0.18 | -10.24                        | 2.49                         |
| Coating 6      | 0.01063       | 0.21 | -16.77                        | 2.71                         |
| Coating 7      | 0.01057       | 0.28 | -22.81                        | 3.28                         |
| Sample 14SA01  |               |      |                               |                              |
| Coating 8      | 0.01060       | 0.25 | -19.67                        | 3.03                         |
| Coating 9      | 0.01067       | 0.17 | -12.63                        | 2.42                         |
| Coating 10     | 0.01074       | 0.31 | -5.99                         | 3.54                         |
| Coating 11     | 0.01071       | 0.12 | -9.47                         | 2.09                         |
| Coating 12     | 0.01076       | 0.16 | -4.70                         | 2.35                         |
| Coating 13     | 0.01062       | 0.20 | -18.12                        | 2.64                         |
| Coating 14     | 0.01070       | 0.19 | -9.71                         | 2.56                         |
| Coating 15     | 0.01064       | 0.17 | -15.88                        | 2.42                         |
| Coating 16     | 0.01064       | 0.29 | -15.58                        | 3.37                         |
| Coating 17     | 0.01061       | 0.17 | -18.84                        | 2.42                         |
| Coating 18     | 0.01065       | 0.24 | -14.38                        | 2.95                         |

| Sample 99SA07 |         |      |        |       |
|---------------|---------|------|--------|-------|
| Other CM 1    | 0.01056 | 0.45 | -23.89 | 4.82  |
| Other CM 2    | 0.01089 | 0.13 | 7.95   | 2.15  |
| Other CM 3    | 0.01084 | 0.11 | 3.43   | 2.04  |
| Other CM 4    | 0.01083 | 0.15 | 2.22   | 2.28  |
| Other CM 5    | 0.01073 | 0.2  | -6.95  | 2.64  |
| Other CM 6    | 0.01069 | 0.14 | -11.49 | 2.21  |
| Sample 12SA36 |         |      |        |       |
| Other CM 7    | 0.01095 | 0.11 | 13.51  | 2.04  |
| Other CM 8    | 0.01074 | 0.29 | -5.94  | 3.37  |
| Other CM 9    | 0.01076 | 0.16 | -4.48  | 2.35  |
| Other CM 10   | 0.01078 | 0.23 | -2.28  | 2.87  |
| Other CM 11   | 0.01070 | 0.44 | -9.71  | 4.72  |
| Other CM 12   | 0.01033 | 3.72 | -45.01 | 37.24 |
| Sample 14SA01 |         |      |        |       |
| Other CM 13   | 0.01031 | 0.81 | -47.44 | 8.28  |
| Other CM 14   | 0.01057 | 0.28 | -22.81 | 3.28  |
| Other CM 15   | 0.01066 | 0.24 | -14.19 | 2.95  |
| Other CM 16   | 0.01069 | 0.14 | -11.49 | 2.21  |

245  
246  
247  
248  
249  
250  
251  
252  
253  
254  
255  
256  
257  
258  
259  
260  
261  
262  
263

264 **Table S2.  $\mu$ PIXE quantification: elemental concentrations within carbonaceous materials**

| Element | Irregular<br>clot 1 | Irregular<br>clot 2 | Irregular<br>clot 1 | Irregular<br>clot 1 | Irregular<br>clot 1 | Particle<br>coating 1 | Particle<br>coating 1 | Particle<br>coating 1 | Particle<br>coating 1 | Flake 1 | Flake 2 | Flake 3 | Flake 4 | Flake 5 | Flake 6 |
|---------|---------------------|---------------------|---------------------|---------------------|---------------------|-----------------------|-----------------------|-----------------------|-----------------------|---------|---------|---------|---------|---------|---------|
| P       | 1654                | 304                 | 207                 | 71                  | 45                  | 0                     | 61                    | 0                     | 0                     | 253     | 244     | 75      | 32      | 3132    | 1490    |
| S       | 603                 | 0                   | 48                  | 4                   | 0                   | 0                     | 223                   | 41                    | 0                     | 24      | 67      | 287     | 17      | 64      | 65      |
| K       | 2030                | 30                  | 208                 | 81                  | 176                 | 0                     | 430                   | 339                   | 0                     | 364     | 17      | 796     | 56      | 101     | 519     |
| Ca      | 84                  | 2                   | 5                   | 0                   | 9                   | 0                     | 0                     | 0                     | 0                     | 15      | 79      | 39      | 156     | 160     | 240     |
| Ti      | 62195               | 160                 | 199                 | 48                  | 56                  | 0                     | 21                    | 0                     | 0                     | 1085    | 7206    | 534     | 117     | 59      | 355     |
| V       | 1059                | 337                 | 228                 | 0                   | 2                   | 39                    | 5                     | 36                    | 245                   | 75      | 240     | 158     | 134     | 0       | 112     |
| Cr      | 1906                | 169                 | 158                 | 57                  | 0                   | 0                     | 51                    | 35                    | 0                     | 9       | 213     | 17      | 0       | 0       | 37      |
| Mn      | 12                  | 0                   | 2                   | 0                   | 0                   | 0                     | 0                     | 0                     | 0                     | 6       | 63      | 0       | 15      | 0       | 645     |
| Fe      | 5120                | 243                 | 186                 | 263                 | 185                 | 163                   | 0                     | 67                    | 223                   | 4161    | 41102   | 1459    | 632     | 1651    | 3491    |
| Co      | 3                   | 9                   | 12                  | 80                  | 4                   | 0                     | 35                    | 0                     | 0                     | 0       | 0       | 29      | 0       | 46      | 0       |
| Ni      | 14                  | 44                  | 37                  | 392                 | 32                  | 1                     | 874                   | 257                   | 118                   | 50      | 451     | 81      | 18      | 23      | 49      |
| Cu      | 102                 | 8                   | 2                   | 0                   | 4                   | 0                     | 605                   | 0                     | 26                    | 19      | 4       | 7       | 12      | 11      | 0       |
| Zn      | 23                  | 6                   | 4                   | 0                   | 1                   | 0                     | 5                     | 0                     | 0                     | 3       | 21      | 10      | 0       | 7       | 7       |
| As      | 139                 | 7                   | 19                  | 2                   | 48                  | 0                     | 89                    | 0                     | 0                     | 0       | 0       | 8       | 0       | 0       | 0       |
| Zr      | 108                 | 0                   | 1                   | 0                   | 2                   | 0                     | 0                     | 25                    | 0                     | 29      | 105     | 0       | 0       | 0       | 19      |
| Mo      | 1                   | 0                   | 1                   | 0                   | 0                   | 0                     | 0                     | 0                     | 0                     | 0       | 0       | 0       | 0       | 0       | 0       |

265

266

267 **Table S3.  $\mu$ PIXE quantification: elemental concentrations within the adjacent matrix**

268 **Regions of analysis were chosen adjacent to the microstructures analysed in Table S2.**

269

| Element | Irregular<br>clot 1 | Irregular<br>clot 2 | Irregular<br>clot 1 | Irregular<br>clot 1 | Irregular<br>clot 1 | Particle<br>coating 1 | Particle<br>coating 1 | Particle<br>coating 1 | Particle<br>coating 1 | Flake 1 | Flake 2 | Flake 3 | Flake 4 | Flake 5 | Flake 6 |
|---------|---------------------|---------------------|---------------------|---------------------|---------------------|-----------------------|-----------------------|-----------------------|-----------------------|---------|---------|---------|---------|---------|---------|
| P       | 0                   | 246                 | 185                 | 1137                | 22                  | 22                    | 67                    | 22                    | 22                    | 179     | 406     | 0       | 577     | 1377    | 0       |
| S       | 0                   | 0                   | 0                   | 50                  | 0                   | 0                     | 41                    | 0                     | 0                     | 13      | 34      | 0       | 168     | 40      | 68      |
| K       | 712                 | 22                  | 195                 | 1423                | 99                  | 99                    | 299                   | 99                    | 99                    | 868     | 129     | 827     | 211     | 1043    | 461     |
| Ca      | 73                  | 1582                | 23                  | 166                 | 15                  | 15                    | 6                     | 15                    | 15                    | 28      | 41      | 47      | 7       | 74      | 385     |
| Ti      | 80                  | 21                  | 90                  | 278                 | 4                   | 4                     | 58                    | 4                     | 4                     | 137     | 171     | 221     | 31      | 342     | 128     |
| V       | 95                  | 64                  | 192                 | 786                 | 1                   | 1                     | 2                     | 1                     | 1                     | 8       | 28      | 33      | 25      | 309     | 207     |
| Cr      | 213                 | 55                  | 240                 | 488                 | 3                   | 3                     | 58                    | 3                     | 3                     | 82      | 10      | 24      | 8       | 80      | 23      |
| Mn      | 0                   | 0                   | 2                   | 0                   | 0                   | 0                     | 0                     | 0                     | 0                     | 2       | 3       | 310     | 0       | 0       | 0       |
| Fe      | 250                 | 99                  | 71                  | 229                 | 42                  | 42                    | 116                   | 42                    | 42                    | 1166    | 2099    | 2294    | 401     | 1469    | 1596    |
| Co      | 0                   | 0                   | 0                   | 10                  | 0                   | 0                     | 16                    | 0                     | 0                     | 5       | 5       | 0       | 0       | 24      | 0       |
| Ni      | 7                   | 1                   | 17                  | 77                  | 5                   | 5                     | 54                    | 5                     | 5                     | 27      | 36      | 36      | 18      | 21      | 102     |
| Cu      | 9                   | 0                   | 4                   | 0                   | 0                   | 0                     | 12                    | 0                     | 0                     | 10      | 13      | 5       | 2       | 8       | 30      |
| Zn      | 8                   | 1                   | 1                   | 3                   | 0                   | 0                     | 1                     | 0                     | 0                     | 3       | 8       | 7       | 3       | 14      | 5       |
| As      | 9                   | 3                   | 0                   | 0                   | 12                  | 12                    | 7                     | 12                    | 12                    | 2       | 1       | 2       | 1       | 0       | 0       |
| Zr      | 1                   | 0                   | 0                   | 0                   | 0                   | 0                     | 4                     | 0                     | 0                     | 2       | 20      | 6       | 0       | 0       | 0       |
| Mo      | 0                   | 0                   | 0                   | 0                   | 0                   | 0                     | 1                     | 0                     | 0                     | 0       | 0       | 0       | 0       | 0       | 0       |

270

271

272

273

274

275

276

277

278

279

280

281

282

283

284

285

286

287

288

## 289 Supplementary Discussion

290

### 291 Validating the interpretation of the elemental signatures observed in carbonaceous 292 material as palaeo-metallomic signatures

293

#### 294 1. Palaeoenvironmental calibration

295

296 The mode of occurrence of metal enrichment in carbonaceous material is critically important  
297 in distinguishing its origin. The palaeoenvironment must be demonstrated to be habitable and,  
298 in the event of interpreting metal enrichment as a palaeo-metallomic signature, the predicted  
299 organisms and metabolisms should be consistent with the estimated environment.

300 Highly detailed field observations coupled with bulk and *in situ* geochemical data for  
301 the Josefsdal Chert indicate that the environment of deposition was a volcano-hydrothermal  
302 basinal setting (Westall et al., 2001, 2006, 2015; Hofmann et al., 2013; Hubert, 2015; this  
303 study). Sedimentary structures indicate the action of waves and currents, particularly in banded  
304 cherts (Fig. 2A-B), whereas relict mineralogy clearly indicates volcanic activity (Figs. 2E-F;  
305 S4-S8), which may have occurred in pulses (Westall et al., 2015). Highly siliceous rocks with  
306 poorly laminated macrostructure are best interpreted as chemical precipitates (Fig. 2C-D).  
307 Brecciation and distending of bedding planes has been interpreted as the result of the  
308 hydrothermal activity that would have accompanied volcanism (Hofmann et al., 2013; Westall  
309 et al., 2015). Rare earth element plus yttrium (REE+Y) plots normalised to Mud from  
310 Queensland (MuQ) are the appropriate method by which to analyse the relative contributions  
311 of chemically distinct fluid reservoirs to Archaean sediments (Kamber et al., 2005; Gourcerol  
312 et al., 2015). In these Josefsdal Chert sediments, positive La and Y anomalies (Eqs. 1, 3) in  
313 bulk ICP-MS analyses testify to the presence of marine inputs, as does the enrichment of heavy  
314 REE over light REE (Fig. 2A). Weakly to strongly positive Eu anomalies (up to 2.02; Eq. 2)  
315 can only be attributed to hydrothermal inputs. Although some Eu enrichment can be attributed  
316 to volcanic particle (i.e., feldspar) sequestration of REE (Kerrick et al., 2013), anomalies higher  
317 than 1.20 cannot be accounted for through this alternative explanation. Since even small  
318 quantities of clastic- or mineral-related input can affect the REE+Y signal of hydrogenous  
319 chert, we followed the rigorous approaches of Bolhar and Van Kranendonk (2007), Sugahara  
320 et al. (2010) and Bolhar et al. (2015) in testing whether clastic or terrigenous components can  
321 be considered an input, and not contamination, to the palaeoenvironment. For each formation,  
322 we tested multiple parameters (La, Eu, Ce and Y anomalies and Y/Ho ratios) against total  
323 REE+Y, Ti content, and against one another, as a proxy for contamination of the signal by  
324 clastic input or other hydrospheric influences. We found no systematic relationships between  
325 any two such parameters, ergo ‘contamination’ by clastic material does not affect the REE+Y  
326 signals. Our REE+Y compositions are thus primary. Since similar values are obtained for  
327 various parameters (e.g. anomalies) irrespective of the Ti content, fluid chemistry rather than  
328 clastic input is the dominant control on REE+Y composition (Bolhar et al., 2015).

329 *Eq. 1*  $La/La^*_{MUQ} = La_{MUQ}/(Pr^*_{MUQ}(Pr_{MUQ}/Nd_{MUQ})^2)$

330

331 *Eq. 2*  $Eu/Eu^*_{MUQ} = Eu_{MUQ}/(Sm^2_{MUQ} * Tb_{MUQ})^{1/3}$

332

333 *Eq. 3*  $Y/Y^*_{MUQ} = Y_{MUQ}/(0.5Er_{MUQ} * 0.5Ho_{MUQ})$

334 The major environmental parameters are therefore hydrogenous, of marine and  
335 hydrothermal origins. The shallow gradient is indicative of elevated light REE input, which is  
336 most plausibly interpreted as the result of terrigenous contributions, i.e., the depositional  
337 environment was semi-restricted. Varying anomaly values indicate the fluctuating importance  
338 of these reservoirs during the deposition of the Josefsdal Chert. The presence of hydrothermal

339 fluids in the depositional palaeoenvironment indicates that it would have been a thermophilic  
340 setting. High concentrations of LREE and trace elements more generally denote the elevated  
341 influence of volcanic and terrigenous inputs. In the Palaeoarchaeon, most exposed landmasses  
342 were probably of volcanogenic origin (Lowe and Byerly, 1999; Kamber, 2015; Cawood et al.,  
343 2018). High concentrations of Fe- and Mn-oxyhydroxides in semi-restricted basins were able  
344 to concentrate REE+Y elements and make these elements bio-available (see Jeandel and  
345 Oelkers, 2015). The environment of the Josefsdal Chert was therefore metal-rich, thermophilic,  
346 and replete with chemical disequilibria as a result of the confluence of fluids of different  
347 origins. The studied samples thus reflect a habitable realm.

348 Further information regarding the stratigraphy and sedimentology of the Josefsdal  
349 Chert is given in Westall et al. (2015), including full descriptions of the different lithofacies  
350 present and their interrelationships throughout the stratigraphy.

## 351 2. Multi-scalar modes of occurrence of carbonaceous material

352

353 In light of previous controversies concerning the origin of putatively biogenic  
354 carbonaceous material in Archaean meta-sediments (Brasier et al., 2002, 2006; Lindsay et al.,  
355 2005; Wacey et al., 2016, 2018), it is imperative to explain the origin of carbonaceous material  
356 in terms of its mode of occurrence within the parameters of the environment. For example,  
357 Brasier et al. (2002, 2006) and Lindsay et al. (2005) suggested that the Fischer-Tropsch-type  
358 reactions, known to occur in natural hydrothermal settings, are potential sources of the  
359 carbonaceous material constituting putative biosignatures. Given the evident presence of  
360 hydrothermal inputs to the environment of deposition of the Josefsdal Chert, the contribution  
361 of abiogenic organic matter to the eventual carbonaceous material reservoir must be appraised.  
362 Additionally, Wacey et al. (2018) identified tephra with strong morphological resemblance to  
363 putatively fossiliferous material. Due to the strong volcanic inputs to the Josefsdal Chert  
364 (Hofmann et al., 2013; Westall et al., 2015), this possibility of carbon accumulation by abiotic  
365 means must also be evaluated.

366 The lack of continuity of the metal-rich signature is a function of the preservation of  
367 carbonaceous material. The distribution of elements within PIXE maps is also inconsistent  
368 throughout CM (i.e., over micrometric scales; Fig. S17), but this is an authentic representation  
369 of the micrometric distribution of the CM, which is dispersed as interleaved fragments between  
370 silica crystals after Ostwald ripening under lower greenschist facies metamorphic pressures  
371 and temperatures (van Zuilen et al., 2012; Hickman-Lewis et al., 2017). This distribution is  
372 further evident from the spatial distribution of point enrichments CM obtained by SIMS.

373 Transmission electron microscopy observations confirm that this distribution of carbon  
374 is responsible for the diffuse appearance of clotted carbon when observed at high magnification  
375 in thin section. The ‘blackness’ of clots/coatings is an optical effect, as demonstrated by high-  
376 magnification TEM micrographs (Fig. 2G-H). Where CM is present as only a thin layer, it is  
377 evident that the clot is composed of CM interleaved between micro-crystals of quartz, forming  
378 a web-like 3D network. The CM itself is near-pure carbon and does not incorporate nanoscopic  
379 mineral particles of any mineral other than quartz. Since the quartz lattice is not able to  
380 incorporate either trace and rare earth element or transition metals, any indigenous metal-rich  
381 signature is only due to that conserved within CM.

382 Raman spectroscopy indicates that the CM studied herein has undergone some  
383 graphitisation (Fig. S3) but is mostly disordered i.e., the D band is predominant over the G  
384 band. The thermal maturity of the carbonaceous material is identical to that of the host rock,  
385 proving the syngenicity of the former with the latter (after Hubert, 2015; Westall et al., 2015;  
386 Hickman-Lewis et al., 2016).

387

## 388 3. Biotic or abiotic origin for carbonaceous material?

389  
390  
391  
392  
393  
394  
395  
396  
397  
398  
399  
400  
401  
402  
403  
404  
405  
406  
407  
408  
409  
410  
411  
412  
413  
414  
415  
416  
417  
418  
419  
420  
421  
422  
423  
424  
425  
426  
427  
428  
429  
430  
431  
432  
433  
434  
435  
436  
437  
438  
439

In this approach to palaeo-metallomics in deep time, a highly conservative methodology is required. This necessarily involves discounting all potential abiotic means of accumulating both the carbonaceous material and its metal enrichments. Indeed, there are several potential abiotic means of accumulating CM in volcano-hydrothermal environments as seen in the studied samples that deserve consideration:

- Fischer-Tropsch-type organic matter synthesised within the hydrothermal system, extruded together with hydrothermal fluid and sequestered within a gel-like chemical sediment (Lindsay et al., 2005) or adhered to mineral phases (cf. Wacey et al., 2016);
- Detrital organic matter of unknown origin aggregated in the water column, falling out of suspension and accumulating within a gel-like sediment;
- Detrital organic matter of mixed origins that re-enters into the hydrothermal system, is assimilated within the hydrothermal fluid and redeposited into a chemical sediment with a direct genetic link to the hydrothermal system (the hydrothermal pump hypothesis; Duda et al., 2018);
- Pyrobitumen inclusions generated either during hydrothermal alteration or subsequent metamorphic processes and fluid migration events, which may be Archaean or younger (cf. Buick et al., 1998);
- Carbon-rich volcanic clasts or tephra, naturally deposited in the system, that strongly resemble microfossils or rip-up clasts from microbialites (Wacey et al., 2018);
- Meteoritic carbon exogenously delivered to the shallow-water depositional environment, before being sequestered into a gel-like sediment.

Addressing these possibilities in turn:

Fischer-Tropsch-type products relevant to this abiogenicity debate are hydrocarbons including alkanes, alkenes and alcohols. Such carbonaceous material may aggregate in the vicinity of hydrothermal vents since these reactions are observed to occur in natural hydrothermal settings (McCollum et al., 1999; Sherwood Lollar et al., 2002). The carbon isotopic fractionation in naturally produced liquid hydrocarbons ranges between +40‰ and –80‰, depending upon the carbon source and reaction series followed (McCollum and Seewald, 2006; Taran et al., 2007). The majority of FTT products exhibit strongly negative carbon isotopic fractionations between –40 and –70‰. The probability maxima of the datasets in the aforementioned publications form a continuum of maxima throughout the values from +40 to –80‰, with striking probability maxima at highly depleted values, corresponding to the abiogenic production of methane by one suite of FTT reactions (McCollum and Seewald, 2006). The FTT reactions would not yield the relatively restricted range of values mostly between –10 and –21‰ reported herein (Fig. 3; Tables 1-2). It is also unknown for FTT processes to produce CM with recurrent morphologies such as the clots and coatings described in this manuscript. Abiotic CM would instead be expected to form unremarkable and nondescript aggregations of material, since it has no morphogenetic growth framework. It is highly unlikely that CM originating from the FTT reactions would form either particle-specific, non-isopachous carbonaceous coatings or recognisable irregular, stellate clots in multiple sedimentary layers. For these reasons, both isotopic and morphogenetic, we consider it entirely unlikely that the CM herein is the result of FTT hydrocarbon production. While it is likely that the FTT processes were active in this environment, their signal is not dominant, likely because their products have very minor prevalence in comparison to other CM.

Detrital organic matter falling out of suspension after autotrophic-heterotrophic production and consumption in the water column may be the source the particulate organic material characterising some CM-rich layers in Archaean cherts (Walsh, 1992; Walsh and

440 Lowe, 1999). Sub-rounded, fluffy particles of CM – superficially similar to the clots described  
441 herein – have been identified in the stratiform ‘Apex chert’ (Brasier et al., 2011; Hickman-  
442 Lewis et al., 2016) and the Dresser Formation (Wacey et al., 2018; Duda et al., 2018; Igisu et  
443 al., 2018). For the latter case, a contribution from water column productivity has been implied.  
444 In modern seafloor sediments, ‘marine snow’ – to which such influx is analogous – occurs as  
445 blanket-like deposits over large areas of the seafloor. This is not the case of the irregular clotted  
446 morphologies in the Josefsdal Chert since they occur within spatially restricted facies confined  
447 to regions of higher hydrothermal flux (Westall et al., 2015). Nor could this possibly be the  
448 case for the particle coating morphologies, which are, as defined by their appellation, particle-  
449 specific within individual sedimentary layers. Increased CM-rich layers in the vicinity of the  
450 outflow of hydrothermal material is instead consistent with an origin as biogenic colonisation  
451 associated with hydrothermal effluent (flocs, cf. Juniper et al., 1995; Crowell et al., 2008). For  
452 these organo-sedimentological reasons, it is impossible to interpret the clotted or coating  
453 morphologies as detrital organic matter sourced from outside the local environment.

454 Detrital organic matter reworked and sequestered within hydrothermal veins (Duda et  
455 al., 2018) is a further possible interpretation of the origin of this carbon. We do not consider  
456 that the clotted or coating morphologies could be reworked material since they occur within  
457 primary rock fabrics and far from obvious field- and thin section-scale remobilisation of  
458 material. Their morphologies are not consistent with having undergone transport or mechanical  
459 erosion in the “hydrothermal pump” described by Duda et al. (2018) or within the framework  
460 of the clot-like objects described by Morag et al. (2016). We do not therefore consider it  
461 possible to explain the petrographic occurrence of these two clotted textures in terms of detrital  
462 CM inputs.

463 Oil droplets in the form of thermally mature bitumen globules have been reported from  
464 Archaean successions (Buick et al., 1998; Rasmussen and Buick, 2000), and such structures  
465 could co-exist with clotted carbonaceous material. Extensive and highly detailed SEM and  
466 TEM imaging of the CM studied herein shows that they lack both the regular, smooth shapes  
467 at the microscale (or the granular mesoscale morphologies) of reported bitumen aggregates and  
468 the enrichment of radioactive minerals or elements in their cores. Consequently, the organic  
469 material constituting these clots is unequivocally not thermally matured bitumen.

470 Wacey et al. (2018) provide a compelling account of carbonaceous, entirely abiogenic,  
471 volcanic pseudofossils from the Dresser Formation. Observations of carbonaceous laminae and  
472 accumulations within and onto shards of altered volcanic glass is a potential origin for the  
473 microstructures herein given the notable volcanogenic inputs evidenced by SEM-EDS and  
474 Raman spectroscopy observations in Figures S3-S8). It is not possible to compare our findings  
475 with the pseudocellular morphologies reported by Wacey et al. (2018) since no such  
476 morphologies exist in our samples. The irregular clots bear no morphological similarity to any  
477 of the structures in Wacey et al. (2018) and should be considered of different origin. It is more  
478 challenging to overcome the possibility that the particle coatings may originate from  
479 accumulation on altered volcanic glass and other minerals and we cannot unambiguously  
480 discount this possibility. Nonetheless, since the colonisation of volcanic and other particle  
481 surfaces in contemporaneous cherts has been noted (Westall et al., 2011; Wacey et al., 2011),  
482 it appears that both biotic and abiotic possibilities exist for this fabric, and these should be  
483 explored in more detail in individual cases, ideally using a multi-technique assessment as  
484 conducted herein.

485 Meteoritic carbon is the final potential alternative origin for the accumulation of CM  
486 seen in the Josefsdal Chert. The volume of CM exogenously delivered to the early Earth was  
487 vastly greater than at present due to increased impactor flux early in the history of the solar  
488 system (Maurette and Brack, 2006; Koeberl, 2006). Impactor events, in this case carbonaceous  
489 chondrites, would result in blanket-like carbon deposition and consistent geochemical  
490 signatures on local scales. Examples include the Ir and Pt-group element enrichments seen  
491 together with microkrystites in the Marble Bar chert, Pilbara (Glikson et al., 2016), and the



492 impact spherule layers observed throughout the Barberton greenstone belt (Lowe and Byerly,  
493 2003). Extraterrestrial organic material can exist in Archaean rocks where silicification is  
494 sufficiently rapid to preserve diagnostic indications of meteoritic origins (Gourier et al., 2019).  
495 No regionally traceable blanket-like aggregations of CM or other geochemical and petrological  
496 signatures have been noted in this Josefsdal Chert material, which is in stark contrast to the  
497 regionally detectable extraterrestrial geochemical signatures found in higher horizons of the  
498 same suite of chert (Gourier et al., 2019). The irregular clot and particle coating microstructures  
499 cannot be explained in terms of any known morphology relating to meteoritic impact. While  
500 there was likely a consistent meteoritic input of carbon to the Josefsdal Chert and other  
501 Archaean environments, its contribution to these particular microstructures was negligible, and  
502 likely zero.

503

504 The careful and comprehensive consideration above shows that no plausible abiological  
505 interpretation for either the clot or coating CM morphologies described herein can be sustained  
506 under scrutiny. In all but one case – the possibility that particle coatings may reflect non-  
507 biological accumulation of carbon on volcanogenic particles – an abiological interpretation is  
508 impossible within any known framework. Since the CM described is present as recognisable  
509 microstructures encapsulated rapidly within silica representing the primary deposition of these  
510 meta-sediments, and since demonstrable biogenic interpretations exist for carbonaceous  
511 accumulations on volcanic particles (Westall et al., 2006, 2011; Furnes et al., 2007), an  
512 alternative explanation is required to assess the origin of all CM described herein. The potential  
513 biogenic interpretative frameworks are as follows:

514

- 515 • Detrital biogenic material that has been sequestered into a gel-like sediment with a  
516 direct genetic link to the adjacent hydrothermal system, and is thus not necessarily a  
517 primary fabric;
- 518 • Mixed community cellular material and extracellular products that developed *in situ*  
519 and were consequently preserved in a manner reflecting their mode of growth (a  
520 primary imprint) by virtue of the rapidity of their silicification.

521

522 Addressing these possibilities in turn:

523

524 As noted above, there is no evidence for the detrital origin of the CM described in this  
525 study. Both the fact that the CM morphologies are facies-specific and, within that, particle-  
526 specific, features is unequivocally diagnostic of their origin as a primary textural element.  
527 Furthermore, the lateral variation of clotted structures denotes that they occur under local  
528 environmental control. Previous coupled fieldwork and petrographic work in the Josefsdal  
529 Chert has shown that clot-rich samples originate from more highly silicified regions of outcrops  
530 that are thought to reflect proximity to hydrothermal veins. Detrital CM, whether of biological  
531 or abiological origin, would not form facies-specific microstructures with irregular  
532 morphologies, but rather a laterally indiscriminate enrichment throughout all time-equivalent  
533 sediments of the Josefsdal Chert basin. We therefore discount one of the possible biological  
534 interpretations – that the irregular clots and particle coatings reflect the sequestration of  
535 biogenic material from mixed and unknowable proximal and distal sources – as unsupported  
536 by our detailed field and petrographic assessment of these rocks.

537

538 The second biological interpretation, that the CM represents the rapidly preserved  
539 primary imprint of a community that developed *in situ* within certain horizons of the Josefsdal  
540 Chert, requires several key pieces of evidence. Firstly, it demands that the structures, being  
541 rapidly silicified, should be preserved in three dimensions with no preferential axis. The  
542 carbonaceous matter forming both irregular clots and particle coatings is indeed preserved in  
543 three dimensions, as demonstrated by thin sections cut both parallel and perpendicular to the  
544 faint bedding present in these samples. Furthermore, the clots are apparently templated by

544 micron-scale minerals which may or may not occur within the carbonaceous matter, and do not  
545 contribute to grain-supported fabrics in the cherts (as would be the case for pelagic marine  
546 snow or detrital carbonaceous material deposits). Secondly, the clots and coatings should be  
547 facies-specific, suggesting an ecological functionality, and not be ubiquitous throughout the  
548 Josefsdal Chert sediments, which are highly varied. Both microstructures are indeed  
549 lithofacies-specific, occurring only in near-pure hydrothermally influenced chert for irregular  
550 clots, and within hydrothermally influenced, shoreface volcanoclastic sediments for particle  
551 coatings. The first of these is not a common lithofacies within the Josefsdal Chert (see  
552 stratigraphic column from Westall et al., 2015), and this is compelling evidence for the  
553 irregular clots being an environmentally constrained phenomenon. As noted above, this  
554 lithofacies is also laterally variable. The origin of biological morphological specificity under  
555 facies influence has been noted in mat-building fabrics in younger sediments from the  
556 Mesoarchaeon Moodies Group of South Africa (Homann et al., 2015). Concomitantly, one  
557 would certainly not expect palaeoenvironmental or facies restriction for detrital carbonaceous  
558 matter of either biogenic or abiotic origin. This further argues for the rejection of those  
559 hypotheses.

560 If the clotted carbon reflects a community signature as seen in modern-day microbe-  
561 mineral clots and flocs (Juniper et al., 1995; Crowell et al., 2008), and not a monospecific entity  
562 (which is highly unlikely and impractical in most natural systems), the carbon isotopic  
563 fractionation should be varied and centred around values that are negative. Most common  
564 anoxygenic photosynthetic bacteria produce carbon isotope fractionations between  $-8$  and  $-$   
565  $22\text{‰}$  (Schidowski et al., 1984, 1988). This almost exactly matches the isotopic fractionation  
566 seen in our samples ( $\delta^{13}\text{C}$  between  $-3.5$  and  $-41.3\text{‰}$ , mostly  $-11.5\text{‰}$  to  $-21.0\text{‰}$ , with strong  
567 probability maxima between  $-10$  and  $-21\text{‰}$ ). These values are consistent with the expected  
568 biomes present on the anoxic early Earth, which were likely mediated in part by RuBisCO  
569 (Nisbet, 2000; Nisbet and Sleep, 2001; Arndt and Nisbet, 2012). Values that significantly  
570 deviate from these probability maxima are generally not of significant number; the  
571 overwhelming majority of  $\delta^{13}\text{C}$  measurements (even in non-specific morphologies of carbon)  
572 are between  $0$  and  $-25\text{‰}$ , which is highly consistent with anoxygenic, sulphate-reducing and  
573 methane-metabolising organisms.

574 We are therefore able to both refute all potential abiological (and some unsupported  
575 biological) hypotheses on the origin of these microstructures and arrive at a conclusion for their  
576 origin that satisfies two- and three-dimensional petrographic observations and geochemical  
577 data from isotope ratio mass spectrometry. This conclusion is consistent with expected biomes  
578 in the palaeoenvironment determined for these cherts based on stratigraphy, trace and rare earth  
579 element geochemistry and Archaean ecosystem theory (e.g., Nisbet, 2000).

580 Consequently, it is acceptable to assess the metal enrichments observed by particle-  
581 induced X-ray emission (PIXE) in a biological framework of understanding. Indeed, this  
582 carbonaceous material can be deemed of likely biological origin from these analyses alone.

583

#### 584 4. Determining the origin of metal enrichment

585

586 Having demonstrated the highly probable biogenicity of the CM described herein, one  
587 can then address the potential contributions of various metabolisms through decoding the  
588 palaeo-metallome. This approach is described in the main manuscript, however, some  
589 important practical details are provided in this supplement. Metals are bio-essential to all life  
590 in various concentrations and fractional contributions, and have widespread utility in  
591 metalloproteins, enzymatic co-factors, biosynthetic polysaccharides and heteropolymers, and  
592 other molecules (Williams, 1981, 2001; Fraústo da Silva and Williams, 2001; Williams and  
593 Fraústo da Silva, 2003; Hosseinzadeh, and Lu, 2016; Moore et al., 2017). This metal and  
594 metalloid composition is termed the metallome and can be considered the third element of cell  
595 expression alongside the genome (the complete set of genes or genetic material present in a

596 cell or organism) and proteome (the entire complement of proteins that is or can be expressed  
597 by a cell, tissue, or organism). Of the three, the metallome is the only likely candidate for  
598 preservation throughout deep time, since biomarkers indicative of the proteome have been  
599 shown not to preserve in ancient sediments as previously reported (French et al., 2015), but are  
600 instead more readily subjected to extremely rapid degradation and denaturing. In our highly  
601 conservative approach to the deduction of the palaeo-metallome, we have followed the  
602 recommendations of Phanerozoic fossil metallome studies (Wogelius et al., 2011; Edwards et  
603 al., 2014). Since the presence of elevated concentrations of certain elements can be linked to  
604 their presence in specific cellular nanomachines in precursor biological materials (Zerkle et al.,  
605 2005; Lobinski et al., 2010; Cameron et al., 2012), finding spatially delimited significant  
606 enrichments is crucial. For example, previous all-elements analysis (terminology of Haraguchi,  
607 2004) has found spatially restricted enrichments in elements that have been interpreted as bio-  
608 functional to the plant cells of fossil leaves (Edwards et al., 2014). The detected composition  
609 must be explicable in terms of the metabolism of the proposed organism, its palaeoenvironment  
610 (which defines the elemental budget of the ecosystem of which it is a part) and its diagenetic  
611 history, although we strongly recommend that samples having been subjected to visible  
612 diagenetic effects, for example the highly recrystallised stromatolites of the Dresser Formation  
613 (Hickman-Lewis et al., 2019) or the tourmaline-altered stromatolites of the Mendon Formation  
614 (Byerly et al., 1986) should be discounted as candidates for palaeo-metallomic studies.

615 The occurrence of CM as fragments interleaved between microquartz crystals  
616 (described in Section 1.2) is sustained by the patterns of observation of elemental concentration  
617 seen in  $\mu$ PIXE maps (and indeed for carbon detection in SIMS measurements). Individual  
618 regions that are strongly enriched in CM are also those that show high metal enrichment in  
619  $\mu$ PIXE maps. The surrounding silica matrix does not show elevated concentrations of metals.  
620 There is no direct correlation between the appearance of concentrations in the maps, which are  
621 a function of the number of counts at any specific point, and the concentration (ppm) of that  
622 element, which is a function of the detector-specific quantification of that element according  
623 to the algorithm of Gupix (see Halden et al., 1995; Campbell et al., 1995; Maxwell et al., 1995).  
624 Generally, higher concentrations of elements are seen in regions of visually elevated  
625 concentration of CM, although we caution that the ‘blackness’ of a region of chert should be  
626 considered an optical effect, as described using sub-micron TEM micrographs above. Although  
627 the detection of some elements is below the theoretical detection limit of PIXE (~100 ppm for  
628 most elements), the ability to map their occurrence in discrete energy channels is consistent  
629 with their occurrence as shown in the individual element maps, but at relatively low  
630 concentrations (< 100 ppm) (Halden et al., 1995; Campbell et al., 1995). These elements  
631 should, nonetheless, be considered present.

632 As shown in SEM-EDS analyses and TEM micrographs, the studied clots contained  
633 micron-scale mineral phases but did not contain nanoscopic minerals. Nanoscopic minerals  
634 therefore cannot be the ‘unseen’ source of metal enrichment since they are not present. To  
635 remove micron-scale enrichments due to minerals, we excluded any small regions within PIXE  
636 scans that showed exceptional enrichments in metals (the ‘mineral effect’, see Methods). The  
637 characterisation of carbonaceous materials was then made only on regions that did not include  
638 mineral particles. Individual minerals or groups of minerals were identified in PIXE software  
639 and avoided during quantification using SupraVisio and Gupix, such that the analysis of CM  
640 itself used only regions free from obvious metal enrichments due to micron-scale mineral  
641 phases. The size and frequency of occurrence of micron-scale mineral phases directly  
642 corresponds to the frequency with which mineral phases are observed in SEM images.  
643 Furthermore, the remaining CM shows a weaker enrichment in metals relative to the matrix,  
644 demonstrating the success and applicability of our practical approach to removing irrelevant  
645 mineralogical metal enrichments.

646

647 Consequently, we have deduced the following: i) the metal signature reported in the  
648 study is neither due to nanoscopic mineral phases nor to micron-scale mineral phases, because  
649 these are, respectively, not present and mitigated by the ‘mineral effect’; and ii) the reported  
650 metal enrichments are demonstrably indigenous to the carbonaceous matter. Since we have  
651 demonstrated above that the CM is highly likely to be of biological origin and was rapidly  
652 preserved, we should interpret the concentrations of metals in CM as a palaeo-metallomic  
653 biosignature that reflects the characteristics of the precursor biomass. Two key points are then  
654 important in the assessment of the signature as a palaeo-metallomic biosignature:  
655

- 656 i) Biological carbonaceous matter readily scavenges metals from the environment  
657 during its life processes (this is a fundamental process in all metabolism and cellular  
658 catalysis; Fraústo da Silva and Williams, 2001), and has been experimentally  
659 demonstrated to considerably outcompete non-biological material in the retention  
660 of heavy metals (Schultz-Lam et al., 1993, 1996; Loaec et al., 1998). Bacterial  
661 surfaces (both Gram negative and Gram positive) provide loci for the sorption of  
662 metals due to the overall anionic charges of the electronegative macromolecules  
663 that constitute their cell walls. The use of bacteria as a means to counteract the  
664 severe pollutant effects of acid mine drainage is testament to their efficiency in  
665 metal sorption. The potential for non-specific binding by extracellular polymers  
666 requires an appraisal of the potential presence and relevance of each element in turn.  
667 For example, based on evolutionary biology and current understanding of the  
668 evolution of metal usage in metabolic networks through time, we suggested in the  
669 main manuscript that the enrichment of Cu was not significant of the metallome of  
670 the precursor biomass, since Cu became important in the prokaryote metallome only  
671 after the GOE.
- 672 ii) After deposition and rapid silicification, any post-diagenetic leaching, if indeed it  
673 occurs, acts following the death of the organism, i.e., the two processes do not act  
674 at the same time (Orange et al., 2009, 2011). Since biological molecules are rich in  
675 carboxylate groups, peptidoglycan, teichuronic acid and other heteropolymeric  
676 polysaccharides, they are likely to retain metals accumulated during life even after  
677 death (Schultz-Lam et al., 1993; Orange et al., 2011). This implies that the  
678 metallome is a robust biosignature against diagenesis, and argues for the accuracy  
679 of our estimated metallomes in decoding the nature of the Palaeoarchaeal  
680 ecosystem for which they are relics.

681  
682 For these reasons, in addition to the consideration and comprehensive rejection of  
683 abiogenic means of both accumulating the CM and the metal-rich signatures within it described  
684 above, we justify the interpretation of the metallic complement of this CM as of biological  
685 origin. The relative contributions of each metal are the result of that metal being essential to  
686 the original biomass in some specified concentration. Rapid silicification of the CM provides  
687 a ‘time capsule’ of preservation that assures the survival of the palaeo-metallomic biosignature.  
688 This correlation of elements with organisms has been demonstrated for Phanerozoic material  
689 (Edwards et al., 2014). Negligible alteration of the biosignature can be envisaged after the death  
690 of the organism due to the combination of metal retention expected in biological organic matter  
691 and the impermeability of chert to secondary alteration and elemental remobilisation.  
692  
693

## 694 **References**

695  
696 Arndt, N.T., Nisbet, E.G., 2012. Processes on the young Earth and the habitats of early life. Annual  
697 Review of Earth and Planetary Sciences 40, 521-549.  
698

699 Brasier, M.D., Green, O.R., Jephcoat, A.P., Kleppe, A.K., Van Kranendonk, M.J., Lindsay, J.F.,  
700 Steele, A., Grassineau, N.V., 2002. Questioning the evidence for Earth's oldest fossils. *Nature* 416,  
701 78–81.  
702

703 Brasier, M.D., McLoughlin, N., Green, O., Wacey, D., 2006. A fresh look at the fossil evidence for  
704 early Archaean cellular life. *Philosophical Transactions of the Royal Society of London B: Biological*  
705 *Sciences* 361, 887–902.  
706

707 Brasier, M.D., Wacey, D., McLoughlin, N., 2011. Taphonomy in temporally unique settings: an  
708 environmental traverse in search of the earliest life on Earth. In P.A. Allison and D.J. Bottjer (Eds.),  
709 *Taphonomy: Process and Bias Through Time*, 487 *Topics in Geobiology* 32, Springer.  
710

711 Buick, R., Rasmussen, B., Krapez, B., 1998. Archean oil: evidence for extensive hydrocarbon  
712 generation and migration 2.5–3.5 Ga. *AAPG Bulletin* 82, 50–69.  
713

714 Campbell, J.L., Teesdale, W.J., Halden, N.M., 1995. Theory, practice and application of PIXE  
715 microanalysis and SPM element mapping. *Canadian Mineralogist* 33, 279–292.  
716

717 Cawood, P.A., Hawkesworth, C.J., Pisarevsky, S.A., Dhuime, B., Capitanio, F.A., Nebel, O., 2018.  
718 Geological archive of the onset of plate tectonics. *Phil. Trans. R. Soc. A* 376, 20170405.  
719

720 Crowell, B.A., Lowell, R.P., Von Damm, K., 2008. A model for the production of sulfur floc and  
721 “snowblower” events at mid-ocean ridges. *Geochemistry Geophysics Geosystems* 9, Q10T02.  
722

723 Duda, J.-P., Thiel, V., Bauersachs, T., Mißbach, H., Reinhardt, M., Schäfer, N., Van Kranendonk, M.J.,  
724 Reitner, J., 2018. Ideas and perspectives: hydrothermally driven redistribution and sequestration of  
725 early Archean biomass – the “hydrothermal pump hypothesis”. *Biogeosciences* 15, 1535–1548.  
726

727 Edwards, N.P., Manning, P.L., Bergmann, U., Larson, P.L., van Dongen, B.E., Sellers, W.I., Webb,  
728 S.M., Sokaras, D., Alonso-Mori, R., Ignatyev, K., Barden, H.E., van Veelen, A., Anné, J., Egerton,  
729 V.M., Wogelius, R.A., 2014. Leaf metallome preserved over 50 million years. *Metallomics* 6, 774–782.  
730

731 Fraústo da Silva, J.J.R., Williams, R.J.P., 2001. *The biological chemistry of the elements*. Oxford  
732 University Press, pp. 600.  
733

734 French, K.L., Hallman, C., Hope, J.M., Schoon, P.L., Zumberge, J.A., Hoshino, Y., Peters, C.A.,  
735 George, S.C., Love, G.D., Brocks, J.J., Buick, R., Summons, R.E., 2015. Reappraisal of hydrocarbon  
736 biomarkers in Archean rocks. *PNAS* 112, 5915–5920.  
737

738 Furnes, H., Banerjee, N.R., Staudigel, H., Muehlenbachs, K., McLoughlin, N., de Wit, M., Van  
739 Kranendonk, M., 2007. Comparing petrographic signatures of bioalteration in recent to Mesoarchean  
740 pillow lavas: tracing subsurface life in oceanic igneous rocks. *Precambrian Research* 158, 156–176.  
741

742 Glikson, A.Y., Hickman, A., Evans, N.J., Kirkland, C.L., Park, J.-W., Rapp, R., Romano, S., 2016. A  
743 new ~3.46 Ga asteroid impact ejecta unit at Marble Bar, Pilbara Craton, Western Australia: A  
744 petrological, microprobe and laser ablation ICPMS study. *Precambrian Research* 279, 103–122.  
745

746 Gourcerol, B., Thurston, P.C., Kontak, J.D., Côté-Mantha, O., 2015. Interpretations and implications  
747 of LA ICP-MS analysis of chert for the origin of geochemical signatures in banded iron formations  
748 (BIFs) from the Meadowbank Gold Deposit, Western Churchill Deposit, Nunavut. *Chemical Geology*  
749 410, 89–107.  
750

751 Halden, N.M., Campbell, J.L., Teesdale, W.J., 1995. PIXE microanalysis in mineralogy and petrology.  
752 *Canadian Mineralogist* 33, 293–302.  
753

754 Hickman-Lewis, K., Garwood, R.J., Brasier, M.D., Goral, T., Jiang, H., McLoughlin, N., Wacey, D.,  
755 2016. Carbonaceous microstructures of the 3.46 Ga stratiform 'Apex chert', Chinaman Creek locality,  
756 Pilbara, Western Australia. *Precambrian Research*, 278, 161-178.  
757

758 Hickman-Lewis, K., Garwood, R.J., Withers, P.J., Wacey, D., 2017. X-ray microtomography as a tool  
759 for investigating the petrological context of Precambrian cellular remains. In *Earth System Evolution*  
760 *and Early Life: A Celebration of the Work of Martin Brasier*, Geological Society of London Special  
761 Publication 448.  
762

763 Hofmann, A., Bolhar, R., Orberger, B., Foucher, F., 2013. Cherts of the Barberton Greenstone Belt,  
764 South Africa: Petrology and trace-element geochemistry of 3.5 to 3.3 Ga old silicified volcanoclastic  
765 sediments. *South African Journal of Geology* 116, 297-322.  
766

767 Homann, M., Heubeck, C., Airo, A., Tice, M.M., 2015. Morphological adaptations of 3.22 Ga tufted  
768 microbial mats to Archean coastal habitats (Moodies Group, Barberton Greenstone Belt, South  
769 Africa). *Precambrian Research* 266, 47-64.  
770

771 Hosseinzadeh, P., Lu, Y., 2016. Design and fine-tuning redox potentials of metalloproteins involved in  
772 electron transfer in bioenergetics. *Biochim. Biophys. Acta Bioenerg.* 1857, 557-581.  
773

774 Hubert, A., 2015. Chemical and mineralogical signatures of oxygenic photosynthesis in Archean and  
775 Paleoproterozoic sediments. Thesis, Université d'Orléans.  
776

777 Jeandel, C., Oelkers, E.H., 2015. The influence of terrigenous particulate material dissolution on ocean  
778 chemistry and global element cycles. *Chemical Geology* 395, 50-66.  
779

780 Juniper, S.K., Martineu, P., Sarrazin, J., Gélinas, Y., 1995. Microbial-mineral floc associated with  
781 nascent hydrothermal activity on CoAxial Segment, Juan de Fuca Ridge. *Geophysical Research Letters*  
782 22, 179-182.  
783

784 Kamber, B.S., Greig, A., Collerson, K.D., 2005. A new estimate for the composition of weathered  
785 young upper continental crust from alluvial sediments, Queensland, Australia. *Geochimica et*  
786 *Cosmochimica Acta* 69, 1041-1058.  
787

788 Kamber B.S, 2015. The evolving nature of terrestrial crust from the Hadean, through the Archaean, into  
789 the Proterozoic. *Precambrian Research* 258, 48-82.  
790

791 Kerrich, R., Said, N., Manikyamba, C., Wyman, D., 2013. Sampling oxygenated Archean hydrosphere:  
792 Implication from fractionations of Th/U and Ce/Ce\* in hydrothermally altered volcanic sequences.  
793 *Gondwana Research* 23, 506-525.  
794

795 Koeberl, C., 2006. The record of impact processes on the early Earth: A review of the first 2.5 billion  
796 years. in Reimold, W.U., and Gibson, R.L. (Eds.) *Processes on the Early Earth: Geological Society of*  
797 *America Special Paper* 405, 1-22.  
798

799 Lindsay, J.F., Brasier, M.D., McLoughlin, N., Green, O., Fogel, M., Steele, A., Mertzman, S., 2005.  
800 The problem of deep carbon – an Archean paradox, *Precambrian Research* 143, 1-22.  
801

802 Loaëc, M., Olier, R., Guezennec, J., 1998. Chelating properties of bacterial exopolysaccharides from  
803 deep-sea hydrothermal vents. *Carbohydrate Polymers* 35, 65-70.  
804

805 Lowe, D.R., Byerly, G.R., 2007. An overview of the geology of the Barberton Greenstone Belt and  
806 vicinity: implications for early crustal development. In Van Kranendonk, M.J., Smithies, R.H., Bennett,  
807 V.H. (Eds.) *Earth's Oldest Rocks*, Elsevier (Developments in Precambrian Geology), Amsterdam, pp.  
808 481-526.  
809

810 Lowe, D.R., Byerly, G.R., Kyte, F.T., Shukolyukov, A., Asaro, F., Krull, A., 2003. Spherule beds 3.47–  
811 3.34 Ga-old in the Barberton greenstone belt, South Africa: A record of large meteorite impacts and  
812 their influence on early crustal and biological evolution: *Astrobiology* 3, 7–48.  
813

814 Maurette, M., Brack, A., 2006. Cometary petroleum in Hadean time. *Meteoritics and Planetary Science*  
815 41, 5247.  
816

817 Maxwell, J.A., Teesdale, W.J., Campbell, J.L., 1995. The Gupix PIXE software package II. *Nuclear*  
818 *Instruments and Method in Physics Research B* 95, 407–421  
819

820 McCollum TM, Ritter G, Simoneit BR. 1999. Lipid synthesis under hydrothermal conditions by  
821 Fischer-Tropsch-type reactions. *Orig Life Evol Biosph* 29, 153–166.  
822

823 McCollum, T.M., Seewald, J.S., 2006. Carbon isotopic composition of organic compounds produced  
824 by abiotic synthesis under hydrothermal conditions. *Earth and Planetary Science Letters* 243, 74–84.  
825

826 Moore, E.K., Jelen, B.I., Giovannelli, D., Raanan, H., Falkowski, P.G., 2017. Metal availability and the  
827 expanding network of microbial metabolisms in the Archaean eon. *Nature Geoscience* 10, 629–636.  
828

829 Morag, N., Williford, K.H., Kitajima, K., Philippot, P., Van Kranendonk, M.J., Lepot, K., Thomazo,  
830 C., Valley, J.W., 2016. Microstructure-specific carbon isotopic signatures of organic matter from ~3.5  
831 Ga cherts of the Pilbara Craton support a biologic origin. *Precambrian Research* 275, 429–449.  
832

833 Nisbet, E.G., 2000. The realms of Archaean life. *Nature* 405, 625–626.  
834

835 Nisbet, E.G., Sleep, N.H., 2001. The habitat and nature of early life. *Nature* 409, 1083–1091.  
836

837 Orange F, Westall F, Disnar JR, Prieur D, Bienvenu N, Le Romancer M, Défarge C (2009)  
838 Experimental silicification of the extremophilic Archaea *Pyrococcus abyssi* and *Methanocaldococcus*  
839 *jannaschii*. Applications in the search for evidence of life in early Earth and extraterrestrial rocks,  
840 *Geobiology* 7, 403–418.  
841

842 Orange, F., Chabin, A., Gorlas, A., Lucas-Staat, S., Geslin, C., Le Romancer, M., Prangishvili, D.,  
843 Forterre, P., Westall, F., 2011. Experimental fossilisation of viruses from extremophilic Archaea.  
844 *Biogeosciences* 8, 1465–1475.  
845

846 Schidlowski, M., 1984. Biological modulation of the terrestrial carbon cycle: Isotope clues to early  
847 organic evolution. *Advances in Space Research* 4, 183–193.  
848

849 Schidlowski, M., 1988. A 3,800-million-year isotopic record of life from carbon in sedimentary rocks.  
850 *Nature* 333, 313–318.  
851

852 Schultz-Lam, S., Thompson, J.B., Beveridge, T.J., 1993. Metal ion immobilization by bacterial surfaces  
853 in freshwater environments. *Water Quality Research Journal* 28, 51–82.  
854

855 Schultz-Lam, S., Fortin, D., Davis, B.S., Beveridge, T.J., 1996. Mineralization of bacterial surfaces.  
856 *Chemical Geology* 132, 171–181.  
857

858 Sherwood Lollar, B., Westgate, T.D., Ward, J.A., Slater, G.F., Lacrampe-Couloume, G., 2002.  
859 Abiogenic formation of alkanes in the Earth's crust as a minor source for global hydrocarbon reservoirs.  
860 *Nature* 416, 522–524.  
861

862 Taran, Y.A., Kliger, G.A., Sevastianov, V.S., 2007. Carbon isotope effects in the open-system Fischer–  
863 Tropsch synthesis. *Geochimica et Cosmochimica Acta* 71, 4474–4487.  
864

865 van Zuilen, M.A. Fliegel, D., Wirth, R., Lepland, A., Qu, Y., Schreiber, A., Romashkin, A.E.,  
866 Philippot, P., 2012. Mineral-templated growth of natural graphite films. *Geochimica et Cosmochica*  
867 *Acta* **83**, 252–262.  
868

869 Wacey, D., Kilburn, M.R., Saunders, M., Cliff, J., Brasier, M.D., 2011. Microfossils of sulphur-  
870 metabolizing cells in 3.4-billion-year-old rocks of Western Australia. *Nature Geoscience* **4**, 698–702.  
871

872 Wacey, D., Saunders, M., Kong, C., Brasier, A.T., Brasier, M.D., 2016. 3.46 Ga Apex chert  
873 ‘microfossils’ reinterpreted as mineral artefacts produced during phyllosilicate exfoliation. *Gondwana*  
874 *Research* **36**, 296–313.  
875

876 Wacey, D., Noffke, N., Saunders, M., Guagliardo, P., Pyle, D.M., 2018. Volcanogenic pseudo-fossils  
877 from the ~3.48 Ga Dresser Formation, Pilbara, Western Australia. *Astrobiology* **18**, 539–555.  
878

879 Westall, F., de Wit, M.J., Dann, J., van der Gaast, S., de Ronde, C.E.J., Gerneke, D., 2001. Early  
880 Archaean fossil bacteria and biofilms in hydrothermally-influenced sediments from the Barberton  
881 greenstone belt, South Africa. *Precambrian Research* **106**, 93–116.  
882

883 Westall, F., de Vries, S.T., Nijman, W., Rouchon, V., Orberger, B., Pearson, V., Watson, J.,  
884 Verchovsky, A., Wright, I., Rouzaud, J.-N., Marchesini, D., and Severine, A., 2006, The 3.466 Ga  
885 “Kitty’s Gap Chert,” an early Archean microbial ecosystem, in Reimold, W.U., and Gibson, R.L. (Eds.)  
886 Processes on the Early Earth. Geological Society of America Special Paper 405, 105–131.  
887

888 Westall, F., Foucher, F., Cavalazzi, B., de Vries, S.T., Nijman, W., Pearson, V., Watson, J., Verchovsky,  
889 A., Wright, I., Rouzaud, J.-N., Marchesini, D., Anne, S., 2011. Volcaniclastic habitats for early life on  
890 Earth and Mars: a case study from ~3.5 Ga-old rocks from the Pilbara, Australia. *Planetary and Space*  
891 *Science* **59**, 1093–1106.  
892

893 Westall, F., Campbell, K.A., Bréhéret, J.G., Foucher, F., Gautret, P., Hubert, A., Sorieul, S.,  
894 Grassineau, N., Guido, D.M., 2015. Archean (3.33 Ga) microbe-sediment systems were diverse and  
895 flourished in a hydrothermal context. *Geology*.  
896

897 Williams, R.J.P., 1981; The Bakerian Lecture, 1981: natural selection of the chemical elements. *Proc.*  
898 *R. Soc. Lond. B Biol. Sci.* **213**, 361–397.  
899

900 Williams, R.J.P., 2001. Chemical selection of elements by cells. *Coordination Chemistry Reviews* **216–**  
901 **217**, 583–595.  
902

903 Williams, R.J.P., Frausto da Silva, J.J.R., 2003. Evolution was chemically constrained. *Journal of*  
904 *Theoretical Biology* **220**, 323–343.  
905
